# Supplementary material for: Investigating extreme marine summers in the Mediterranean Sea
Source: Copernicus journal article supplement (doi:10.5194/egusphere-2023-1709), 2023-08-03
Supplement: Supplementary file [file egusphere-2023-1709-AC3-supplement.pdf]

### **Reply to Reviewer 3:**

We thank the reviewer for the effort and care with which they assessed this manuscript. We deeply appreciate the time they have dedicated to thoroughly evaluating our work. We have carefully addressed all comments and we have made substantial revisions to the manuscript. We sincerely believe that the provided recommendations have greatly improved the quality of the manuscript.

Please, find below a point-by-point response to all comments. For ease of reference, we have assigned a number to each comment. The reviewer's comments are presented in blue font, while the authors' responses are presented in black font.

### Review: **Investigating extreme marine summers in the Mediterranean Sea**

#### **Major Comments:**

##### **C1. Abstract:**

In general the abstract quotes the main results of the paper. However, the way it is currently written does not form a clear and concise story, rather it presents a series of results concerning the EMSs, without showing how are these connected between them. The entire abstract needs to be re-written in a more cohesive manner, forming an "argument", which shows what is known for the SST/MHW/EMS of the Med. Sea, what is the current problem faced and what is the current study's aim/methodology/added value on the subject tackled.

Thank you for your comment. The abstract has been re-written in a clearer and more cohesive manner, taking also into account your specific suggestions (per-line minor comments) provided later in this review.

##### **C2. Introduction:**

The introduction is very long and currently structured as:

- Importance of SST (Lines 22-30)
- Past Med. Sea SST trends (Lines 31-43). Such a detailed information on the SST variability is not necessary in the Introduction of the paper. Rather on the discussion section where the writers can compare their results with previous literature.
- Future Med. Sea SST trends (Lines 45-48)
- Decadal variability of Med. Sea SST (Lines 50-64)
- MHW trends (Lines 65 - 71)
- MHW impacts on marine life (Lines 73 - 82)
- Motivation for focusing on summer Med.SST (Lines 84 - 92)
- Explanation of the EMS concept (this belongs to Methods section) (Lines 94 -105). This paragraph describes the concept of EMS very vaguely and the reader can get confused. Is the EMS based on the MHW drivers or something else? Better to describe this in Methods and not here.
- Drivers of EMS. This again belongs to Methods (Lines 107 – 114) and it needs to be clarified if it is a paragraph on the drivers of EMS or on motivation for the investigation of the air-sea heat flux effect on EMS. See comments below
- Paper objectives (Lines 116-120). This is the only clear paragraph of the Introduction so far. However, the language needs to be improved. In addition the 4 objectives of the

paper can be re-arranged to:

- Structure of daily SST in EMTs
- Role of SST multi-decadal variability of in the EMS characteristics
- Role of MHWs in EMS
- Drivers of EMS

Once the objectives of the paper are clear then the Introduction structure should describe brief background knowledge on these aspects. Also the writers should define better and briefly the EMS in the Introduction, making clear that EMS is something different from the MHWs, because currently it is not clear. The reader is confused between MHWs and EMS, and whether qualitatively and quantitatively they are the same thing or not or if one is driving the other. In general, it is not clear what the relationship between the two is and what is the added value of the EMS (or what is an EMS in general) compared to MHWs. The writers need to remove some sections from the Introduction that belong mostly to methods and should devote a brief paragraph on explaining the idea behind the EMS and its substructures here.

Additionally, in many paragraphs it is not always clear whether the writers refer to MHW/SST characteristics in the global ocean or in the Med.Sea (for example in lines 84-92), whereas the Introduction section should be more devoted to conditions relevant for the basin, as it progresses. The relevant information from the global ocean (SST) characteristics currently are given here and there but should be used less as a motivation for a study on the basin. Also the period examined should be briefly mentioned in the objectives paragraph.

Given the entire paper needs restructuring (see general comments to the editor ), the writers should more clearly define the objective of their paper and then write an introduction providing information relevant for the paper and not just general characteristics of Mediterranean SST.

Alternative structure of the Introduction could be:

1. Brief description of Mediterranean SST, trends, decadal variability, future trends & its importance
2. Brief review of MHWs in the Med.Sea
3. Brief introduction of EMS idea and how this differs from MHWs
4. Motivation of the study/objectives.

Thank you very much for this detailed analysis and suggestions. The introduction has been revised taking into account the points you raise here, as well as your line-by-line comments provided later on. The information provided on SST, MHWs and their past/future trends has been shortened and is now only relevant to the Med. Sea. More importantly, the EMS concept has been introduced in a clearer manner: our motivation to investigate anomalously high SST conditions on the seasonal scale, the proposed concept of EMSs, and differences with MHWs are clearly communicated within the revised Introduction, as recommended. Relevant explanations are provided under specific comments within this document.

### **Methods:**

The definition of the EMS has fundamental problems:

#### **C3.**

- 1) *“We then define EMSs, separately at each grid point, as the four summers with the*

*highest average JAS SST, i.e., exceeding the 95th percentile of the 71 available summer periods from 1950 to 2020*". If the four summer periods (JAS) where the SST exceeds the 95th percentile are selected then it is likely these 4 summers will be towards the end of the 1950-2020 (This is the first impression the readers get when they start reading the manuscript since the de-trending of the SST comes as an explanation much later in the Methods, which is confusing). In addition why the four warmest summers and not 5 or less summers? Or why not all the summers which are above the 95th percentile in the 1950-2020 period? Is there a specific reason for this choice? Have any sensitivity tests been performed for this choice? The choice of the 4 summers has to be well justified. Is it based on any physical quantity or previous study?

Thank you for your comment. We define EMSs at a particular location as the summers presenting a mean seasonal (Jul-Aug-Sep) SST above the locally computed 95<sup>th</sup> percentile of mean summer SST values within 1950-2020. Considering the 71 summers of the study period, there are 4 summers exceeding this percentile threshold at each location.

The threshold was selected after performing sensitivity tests, to check if important changes are observed when using different percentiles (as different sets of summer-years were identified as extreme in each case). Apart from the expected increase (decrease) in the magnitude of SST anomalies when higher (lower) EMS thresholds are used, these tests showed a similar spatial distribution of SST anomalies and SST substructures in EMSs (as the ones in Fig. 3). Based on these tests, we considered the top 4 summers as a good compromise between the "extremity" of these summers and a sufficient number of summers to be analyzed per grid point. On our concerns on the extreme character of EMSs (in relation to the threshold selection and the limited dataset's length), a larger dataset based on ensemble model data would increase statistical confidence in our analysis (as Röthlisberger et al. (2020) did, in addition to the use of reanalysis data). For the moment, this remains an idea for future work.

The EMS definition in Methods has been rephrased in a clearer and more detailed manner in the revised manuscript. The choice to perform the same analysis also using detrended data, is now justified within the EMS definition in Methods, as recommended.

#### **C4**

*2) "By splitting the summer rank days into different parts of the SST distribution (e.g., the coldest and the warmest half), we quantify the relative contribution of each part to the observed EMS RDA."* I do not see that kind of processing anywhere in Figure 1 so I am not really sure I understand what do the writers mean here. What do you mean by "contribution of the observed EMS RDA"? I only see Rank Day anomalies in Fig. 1c.

Thank you for pointing out the need for further explanation of our methods.

Figure 1c shows an example of how rank day anomalies are distributed during a specific summer. We opted not to provide a detailed description of the rank anomalies methodology as it is thoroughly presented in Röthlisberger et al. (2020). We understand however that the current version of the manuscript is not sufficiently self-explanatory. For this reason, we have updated

Methods including a detailed description of the process to apply this methodology, also adding the equations used for computing the contributions. Hereafter we clarify the parts you mention:

The distribution of rank day anomalies during every EMS (as the example in Fig. 1c for summer 2003) is divided into two equal parts: the coldest and warmest part, ranging from the first to the 46<sup>th</sup> rank day and from the 47<sup>th</sup> to the 92<sup>nd</sup> rank day, respectively. Then, the methodology of R othlisberger et al. (2020) is applied to quantify the contribution of each of the two parts of the distribution (three in their study) to the seasonal SST anomaly. These contributions are calculated for the 4 EMSs at each location (resulting in the maps of Figs 3b-c, d-e) based on the equations:

$$Contr_{coldest} = \left( \frac{1}{4} \sum_{EMS=1}^4 \frac{1}{92} \sum_{d=1}^{46} RDA_{d,EMS} \right) / MA \quad (Eq. 1)$$

$$Contr_{warmest} = \left( \frac{1}{4} \sum_{EMS=1}^4 \frac{1}{92} \sum_{d=47}^{92} RDA_{d,EMS} \right) / MA \quad (Eq. 2)$$

, where the rank day anomaly for each rank day  $d$  during an EMS is obtained by subtracting the rank day mean (mean SST over the 71-summers for rank day  $d$ ) from the SST of rank day  $d$  of the examined EMS.

$$RDA_{d,EMS} = SST_{d,EMS} - \frac{1}{71} \sum_{s=1}^{71} SST_{d,s}$$

, and  $MA$  is the seasonal SST anomaly averaged over the 4 EMS:

$$MA = \frac{1}{4} \sum_{EMS=1}^4 \frac{1}{92} \sum_{d=1}^{92} SST_{d,EMS} - \frac{1}{71} \sum_{s=1}^{71} \frac{1}{92} \sum_{d=1}^{92} SST_{d,s}$$

The computed contributions ( $Contr_{coldest|warmest} \times 100\%$ ) represent which portion of the mean SST anomaly during EMSs is attributed to each part of the distribution.

**C5. Lines 170-173:** “The trend value of each summer season is also removed from all days belonging to this summer to obtain a detrended summer dataset of daily SST values as well”. On top of the de-trending of the multi-decadal SST you also remove the summer trend: Only from the already detrended dataset or from the non-detrended dataset as well? Why is this? What does that summer detrending offer in the study? Also, which months represent the summer detrending here? Jun-August or the Jul-Sep months used to define the EMS? How do you calculate the summer trend? Is it based on the daily summer SST of each year or the trend of the yearly-averaged SST? It is not clear. And what are the days that “belonging to this (which) summer” the de-trending is happening on? The choice of the summer detrending has to be justified and also the method by which the

summer detrending happened has to be mentioned somewhere. At the moment this step of the method is not clearly explained.

Thank you for this comment. We clarify the points you raise in the following: EMSs are detected on the basis of mean summer values. To detect EMSs in a dataset free of multi-decadal trend, we first created a detrended dataset of 71 mean summer values (1950-2020). This was done by removing the multi-decadal variability from the actual mean summer SST time-series. Then, to analyze daily SST free of multi-decadal variability, we also created a detrended dataset of daily values. To create this dataset we used the multi-decadal signal computed above, which is a time-series of 71 values (red dashed line in Fig. 1a). Each of these 71 values was removed from all daily SSTs of the respective summer. Only months Jul-Aug-Sep (JAS) have been considered as marine summer period throughout the manuscript and all processing has been applied per grid point. Methods have been updated in the revised manuscript considering the additional information provided above.

**C6.** The term “SST substructure” could be better replaced by “SST distribution” since the ranking of daily SST resembles an SST distribution.

SST substructure of an extreme summer is a statistical characterization for the way daily SST values are organized over the duration of the summer. We use this term closely following Röthlisberger et al. (2020). We have revised manuscript introducing the term in a clearer manner, explaining that investigating SST substructures of EMSs in this work is done by investigating how the rank day SST distributions form the mean seasonal SST anomalies of these summers.

**C7.** Alternative structure of Methods section is

**2.1** Datasets

**2.2** Definition and Detection of Extreme Marine Summers (Currently named subsections 2.2.1 and 2.2.2 belong to the same section). This is also because the detrending of the SST timeseries should be explained along with the definition of the EMSs. Otherwise the readers get the impression that the EMS are the four warm summers towards the end of the period. These two subsections need to be re-written and merged in the right order so that the reader understands the SST warming trend does not affect the EMS definition. Currently the definition of the EMS is scattered a bit here and there in these paragraphs. Also, justification of the choice of definition/examples on the SST substructures & SST detrending

Thank you for these comments and suggestions.

Regarding detrending: We agree that the EMS definition and our choice to use both the original and detrended datasets should be explained within the same section. In this way we make clear from the beginning that we aim to investigate both the actually warmest EMSs (falling towards the end of the study period) and EMSs resulting from a dataset free of multi-decadal variability. This change has been included in the revised manuscript. However, the detailed description of the detrending method has been kept within a separate section to maintain the flow of the text, allowing the reader to focus on the EMS definition and methodology of SST substructures without being interrupted by detailed methodological explanations.

Regarding our choices in the example on SST detrending: Figure 2a is included in the manuscript to provide the reader an idea on the temporal evolution of mean summer SST values in Med within 1950-2020 as derived from the ERA5 dataset. Neither the mean basin values nor the ones for the considered sub-basins in this figure are used in our analysis, as the entire analysis is performed per grid point. Figure 2b is only an example on applying the Empirical Mode Decomposition on a single time-series. We chose to show the detrended time-series for the entire basin, as the actual time-series for the basin is presented right above (Fig. 2a). These mean-basin values are not used in any part of the manuscript; they only serve as an example for detrending mean summer SST.

Regarding our choices for the example on SST substructures: Figure 1 shows the steps in computing the rank day anomalies at a grid point. We chose to show daily SST time-series for summer 2003 at a location in WMED, as 2003 was a remarkably warm summer especially in WMED.

## C8.

**2.3** If the idea of the EMS idea is retained then it has to be clearly differentiated from the MHW definition and then it would merit giving a brief descriptions of the MHWs.

Thank you for your comment.

The idea of studying extreme seasons was based on the need to better understand elevated SST conditions on the seasonal timescale. As a lot of research has focused on long term warming trends and warm extremes, we believe that investigating extreme seasons in the Mediterranean Sea provides interesting insights from a different perspective.

On our decision to focus on the summer season in the Mediterranean Sea, this is mainly because summers present (and are projected to present in future periods) greater SST trends compared to other seasons, which is highly relevant to impacts on marine life.

After defining extreme marine seasons, as the 4 warmest seasons at each location based on mean seasonal SST, we aimed to investigate their characteristics. The first question we began with, is how the warmest marine summers in the basin have become such. Here comes the analysis of SST substructures during extreme summers, providing information on these summers in relation to climatological summer conditions.

EMSs are related to warm events. We naturally expect to meet higher MHW activity during EMSs compared to mean summer MHW conditions, as MHWs contribute to the increase of the mean seasonal SST. There are, however, fundamental differences. MHWs are events that typically last for days and may reach several weeks according to their causing factors and the concurrent atmospheric and oceanic conditions regulating their duration. On the other hand, an extreme marine season is, by definition, of fixed duration. A JAS period may be detected as extreme due to the highest (lowest) rank days, i.e., warmest (coldest) days, being anomalously warm, or due to a uniform shift of the SST seasonal distribution. Such analysis of extreme seasons has not been performed (to our knowledge) for the Mediterranean Sea.

We agree that extreme marine seasons constitute a new concept and thus require a clear definition. The revised manuscript includes an improved presentation of the extreme summer concept and motivation for this study, a clear definition of EMSs, and a short discussion on differences with MHWs based on the above clarifications.

**C9.**

**2.4 Description of EMS drivers a) Air-sea heat fluxes, b) Upper ocean preconditioning**  
(Sections currently named as 2.2.4 and 2.2.5 could be merged)  
- Description of the PEMS metric.

Thank you for this suggestion. Both the seasonal anomalies of surface fluxes and the new metric are used to investigate surface fluxes during EMSs, we therefore believe that description of the relevant methodologies should remain within the same section (2.2.4). On the other hand, the upper-ocean preconditioning index is presented in a separate short section 2.2.5 as there is no direct link or overlapping with other methods.

**Results:**

**C10.** The Results section should be differentiated from the Discussion section (that needs to be created) by providing solely indicative numbers on the variables described. There has to be a quantification of the results and not a qualitative description based on visuals.

Thank you for very much for bringing up this concern. We chose to provide results along with their discussion taking into account characteristics of the specific tasks performed to investigate extreme summers (SST substructures, MHWs, drivers). Considering the introduction of a new concept (EMS), the use of many, occasionally non-familiar, methodologies and the length of the manuscript, we concluded that presenting the aforementioned tasks independently and discuss results within the corresponding sub-section (3.1, 3.2 and 3.3, respectively) would be easier to follow. In the section for drivers in particular (3.3), our choice to provide results along with their discussion is further related to the content of this section. We considered important to first present and qualitatively discuss basic findings for EMSs (seasonal anomalies for drivers) and then move to quantitative results from the proposed metric (please, see also C13).

Nevertheless, we have included some informative numerical values in all Results sections 3.1, 3.2 and 3.3 in the revised manuscript, as recommended. Please, see our relevant answers in C15, C16, C79, C81.

Re-structuring of Results section could be:

**C11.**

1. Characteristics of EMSs (in original and detrended dataset). Not sure what is the essential difference between Sections 3.1.1 and 3.1.2 but they could be merged and shortened into one clear message.

We agree on merging Sections 3.1.1 and 3.1.2. This has been done in the revised text. As regards the separate sections for detrended data: we had initially followed this approach consistently in the manuscript, dedicating a short sub-section for results using detrended data wherever this analysis has been performed. This was done intentionally to prevent any potential

confusion between results for the two cases. However, we acknowledge that for the sake of reader comprehension, continuity and overall document's flow, merging these sections would likely enhance the manuscript's coherence. We have performed both merging suggestions in the revised manuscript.

#### **C12.**

2. Role of MHWs in EMS (?) ( if EMS are clearly differentiated from MHWs)

- MHW detection
- MHW properties (original & detrended datasets)

Thank you for this suggestion. We have differentiated EMSs from MHWs in the updated EMS definition in Introduction and Methods (please, see our clarifications in C8). We have also merged results from the original and detrended datasets following your suggestion (as in C11), also shrinking the latter to a single key message.

#### **C13.**

3. Drivers of EMS. Merging of Sections 3.3.1, 3.3.2,3.3.3 where one quantifiable method of air-sea heat fluxes contribution should be chosen and described with indicative numbers.

- original dataset
- detrended dataset
- Case study the MHW/EMS 2015.

Thank you for your comment and suggestions. Please, see our previous answer in C10 on the content and structure of Sect.3.3 for drivers. We choose to provide results along with their discussion taking into account the nature of the results of this section. We considered adequate to first present seasonal anomalies for air-sea heat fluxes in EMSs. We believe that these results constitute basic findings for EMSs and deserve to be presented, despite not quantifying the role of the examined variables in forming EMSs. After presenting these findings in the manuscript, we support the need for constructing a metric able to answer “what drives EMSs”, also providing quantitative results. The method to quantify the role of air-sea heat fluxes in the EMS formation in the manuscript is the one for the proposed metric.

We have included some informative numerical values to support the visual comparisons in 3.3.1 following your relevant comment (please, see details in C16).

As regards the detrended dataset, we agree that this short section should be moved right after the corresponding results for the original, so that the flow is not interrupted by other results. We have rearranged the sections accordingly.

#### **Section 3.1.1:**

#### **C14.**

- I understand the rationale behind the focus on the contribution of the warmest and coolest half summer days in Figures 3, however, what about the days that are ranked in the middle of the summer? What about their contribution? At the moment the method sort of examines the SST distribution by only looking at its extreme statistical moments



(the warmest and coolest quantiles of the distribution). But how about the mean of the SST distribution? Does this change too apart from the warmest days getting warmer? It is well known that there is a mean SST shift which drivers warm days to become warmer in the basin.

- More importantly, how is the contribution calculated? The writers simply refer to a contribution to an EMS. How is the EMS represented here as a quantity whose contribution is split into warmest and coldest days? Not clear.

Thank you for this comment. We could have divided the distribution into more than 2 parts, e.g. in 3 parts of equal length (coldest-middle-warmest). This was actually our initial approach. Although it provides more detailed information on the SST distribution, we considered the two-part analysis more easy to follow, while providing new information and the same key message: the warmest part of the distribution accounts for most of the seasonal SST anomaly of EMSs in the greatest part of the basin (with main exception being the southern-central region discussed in the manuscript).

To provide an example of this three-part analysis that separates the middle ranks, we show below the contributions from the coldest-middle-warmest third of the SST distribution to the seasonal anomaly in EMSs: Left from ERA5, right from Copernicus Marine SST L4 data, for a common period 1982-2018 (results on the right are produced just to cross check results with observations for the common period). The contribution percentages are computed as described in Eqs (1) and (2) provided above (C4), but using different summation limits in order to divide the ranked daily SST distribution into 3 parts, from the lowest to the highest rank day.

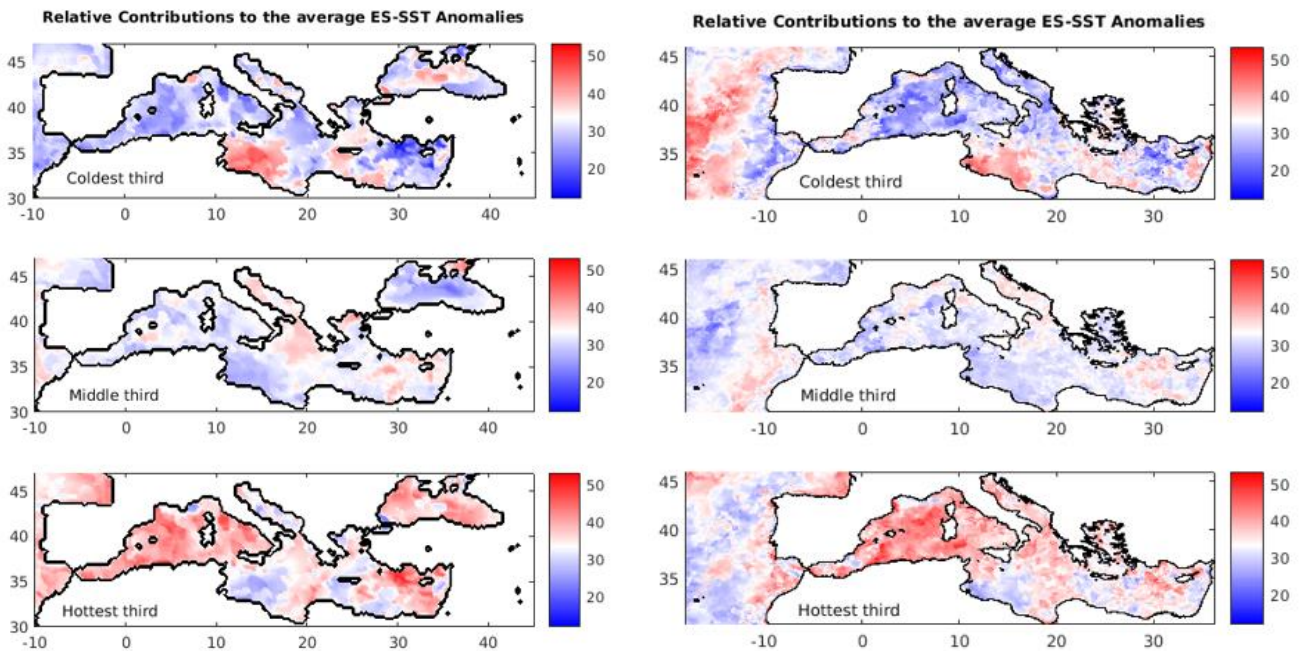

As regards your question on the mean of the distribution: It is based on the mean value of the SST distribution that we identify EMSs (a summer must present a mean summer SST above the

detection threshold to be detected as extreme; see C14). Therefore, the “well known mean shift which drives warm days to become warmer in the basin” is taken into account when investigating EMSs, in the sense that the mean of the distribution in EMSs is, by definition, greater than climatology. This applies also to the detrended data, where no long-term warming trend exists and EMSs do not fall within the recent years, but the means of the EMS distributions are, by definition, greater than the corresponding climatology.

### **C15. Section 3.2.2**

**Line 389:**”...Supporting the latter scenario, MHWs in EMSs appear longer lasting as well as more frequent..”.Although increased frequency and duration of MHWs is a very commonly highlighted result in most studies,i am first curious about a) the increased frequency. In the selected examples of Fig.4 the EMS years were only 4 out of the entire period. How can MHWs be more frequent when the EMS years are only 4 out of 70 years (1950-2020)?Or how can you compare the MHWs during EMS years which (drawn from the example of Fig.4) are less in number compared to the entire period of 70 years? And how can this comparison yield an increased frequency? How can there be an increased frequency of events that are happening in a limited number of years? Unless the writers mean something else here. The only way for a particular point to present more MHWs during EMS period compared to the normal summer periods is if these events are very short and somehow they happen very often, much more often than the normal summer. This however, contradicts the increased duration found for most points in the Med.Sea. In general this comparison of MHW characteristics during EMS and non-EMS years does not seem to have a solid foundation in a sense that the sample of EMS years is very small compared to the average summer period examined. To this end, I do not see the point of comparing the frequencies of MHWs. I am not sure what kind of quantities are compared here.

Hereafter we clarify which quantities are compared when we compute EMS anomalies for MHWs: First, we detect all summer MHWs at each grid point. Next, we compute the mean value of the examined properties (intensity, duration, frequency) over all summers. For frequency for example, this means that the total count of events is divided by the count of summers (71). This is what we consider as mean MHW conditions (in terms of each property) for the summer period. Then, we compute the value of the examined property averaged over the 4 locally detected EMSs. Similarly, frequency here is the number of MHWs falling within EMSs, divided by the number of EMSs (4). This is what we consider as mean MHW conditions in EMSs. EMS anomalies are then computed by subtracting the mean summer value from the mean EMS value. Therefore, frequency anomalies are computed by subtracting the mean summer frequency (count of MHWs per summer) from the mean frequency over the 4 EMSs (count of MHWs per EMS). We do not compare the number of events, but events per year, between all and extreme summers.

In case there are further concerns on the sample size of EMSs (4): MHW detection in this work is based on the commonly used 90<sup>th</sup> percentile threshold which is relatively easy to exceed and thus not expected to capture only the most extreme events. During the 4 EMSs, the total number of detected events ranges from 4 to 16, as shown in the following figure, which is a significant number

considering the number of EMSs and the normally expected event frequency (events per summer in Fig. 6c of the manuscript).

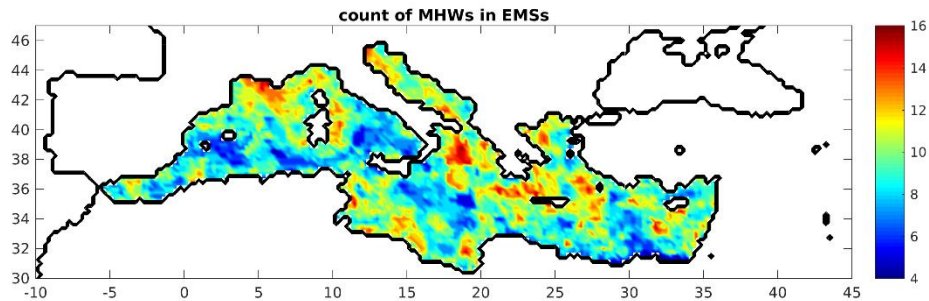

The produced frequency anomalies show a noticeably higher event occurrence during EMSs (see Fig. 6f from the manuscript below). This anomaly field shows that in approximately half of the basin, every EMS experiences at least 2 additional events compared to a normal summer. We believe that the consistently positive anomalies across the entire basin and their significant values in most areas constitute a worth noting result.

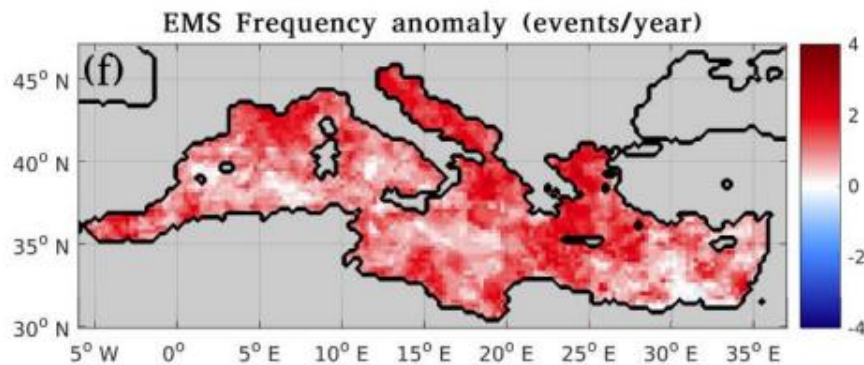

Nevertheless, we have additionally examined MHW days during EMSs, following the relative request of Referee 1. First, MHW days during each summer within 1950-2020 were counted taking into account also events that fall partly within the JAS period. The relative contribution of MHWs during EMSs with respect to mean summer MHW conditions, can be expressed in terms of MHW days, through the percentage of MHW summer days occurring within EMSs (Fig. below). Results show greater percentages in the central and eastern Mediterranean, where almost 50% of the MHWs occur within EMSs. This finding suggests a more pronounced role of MHWs during EMSs in these areas, this time by means of temporal coverage of MHW conditions.

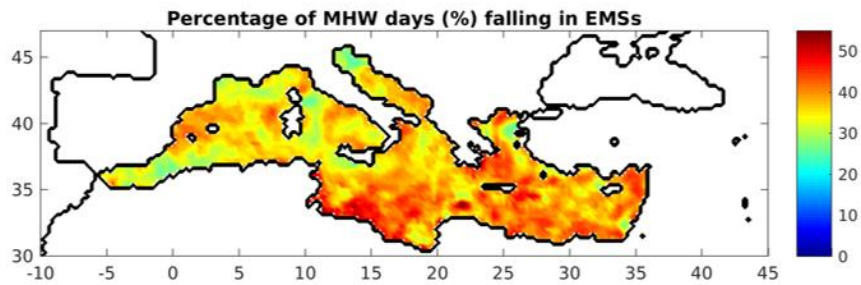

*Percentage of MHW days falling within EMSs (with respect to total count of MHWs within 1950-2020)*

Based on the above, we have included this figure in the Appendix (also considering the relevant request of Reviewer 1), to enrich the existing analysis through an additional metric for the role of MHWs in EMSs, free from the discussed uncertainty.

### **Section 3.3.1 C16.**

- Any kind of attempt to correlate the spatial distributions (maps) between the different air-sea heat fluxes should be accompanied by at least a pattern correlation coefficient. At the moment the comparison are described solely as visuals, without any indicative numbers or coefficients denoting correlation between the different variables. Otherwise the claims made by the writers are not substantiated. I suggest the writers re-write the entire section, at least performing pattern correlations coefficient between the maps of this section. I feel this section belongs better to a Discussion section where the writers need to be careful not to repeat the results from section 3.3.3, where the contributions of the different air-sea heat fluxes are actually quantified. Section 3.3.3 belongs better to the Results section.

Thank you for this comment.

We use the visual comparison of EMS anomalies of the different variables for specific regions as a first means to inform on basic spatial patterns. The patterns we see in the EMS anomaly fields are not similar for the different variables across the entire basin. Given the localized nature of these anomalies, a pattern correlation coefficient (a single value for the entire basin) would not yield meaningful insights in the context of this comparison.

Following your recommendation, we considered useful to provide numerical values for the contribution of each component to the Qnet anomaly in EMSs, rather than only qualitatively describe these contributions while presenting these maps. The draft figure below shows the percentage contribution of LH, SH, SWR and LWR to the EMS anomaly of Qnet. These percentages are computed by dividing the LH/SH/SWR/LWR anomalies of the existing Fig. 7, with the Qnet anomaly (placed on the right below). Note here that 1) positive percentage at a particular location means that the anomaly for the examined component is of the same sign as the

anomaly of Qnet (and vice versa) and that 2) the sum of contributions (positive or negative) from all components equals 100%.

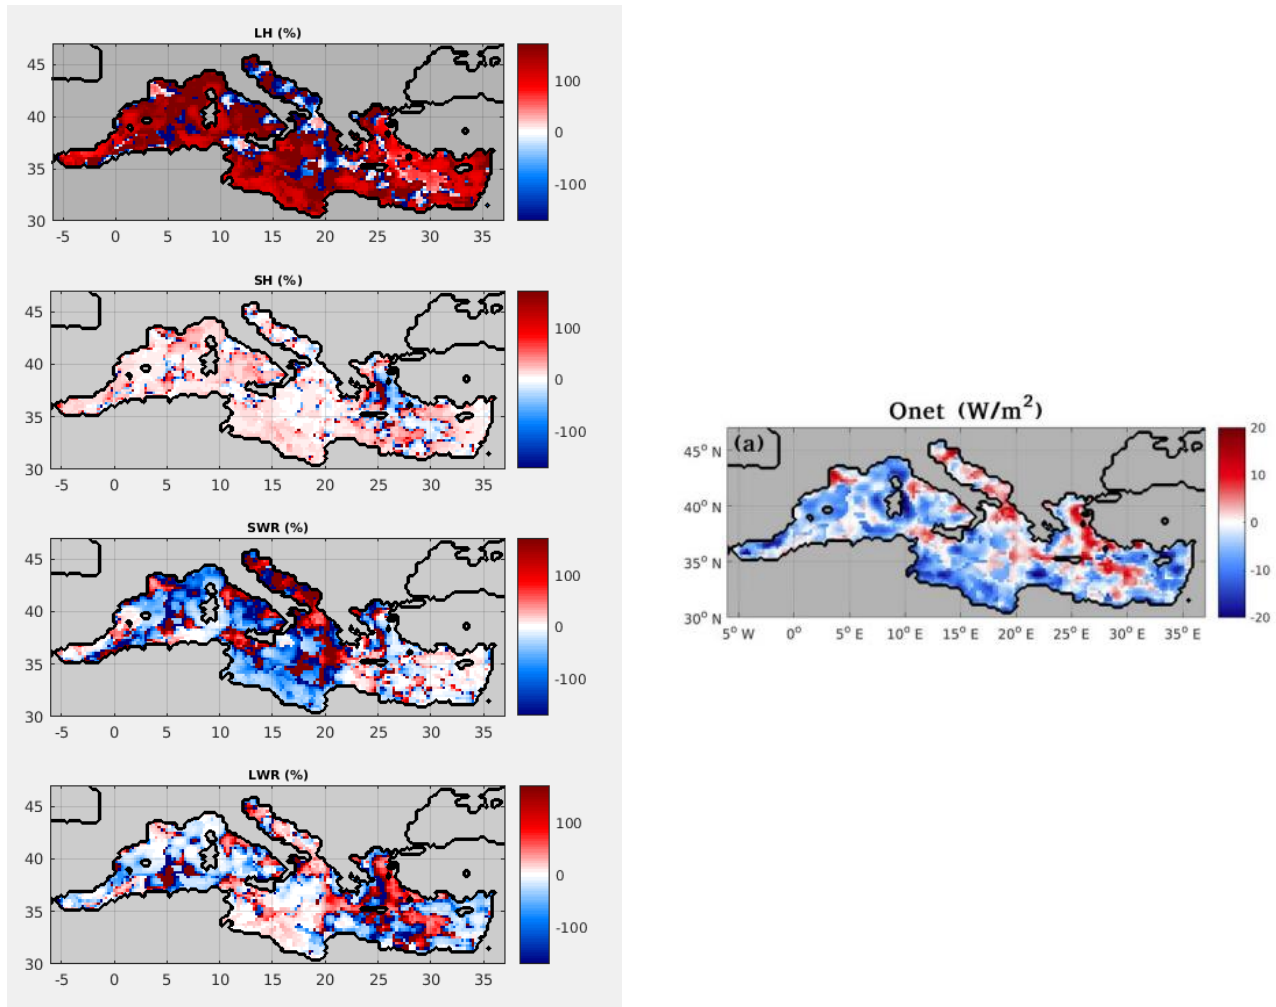

This quantification confirms the dominant role of LH flux, as in most of the basin this component explains from 80% up to more than 100% of the Qnet anomalies (either positive or negative). The Adriatic, parts of the Ionian Sea (and some extra sites) are exceptions on this pattern.

The positive Qnet anomalies observed in the Adriatic Sea are due to SWR anomalies. The latter account for more than 100% of the Qnet anomaly in the positive Qnet anomaly areas, with the exception of a small area close to strait of Otranto where also LH flux contributes of about 20%. Contributions from SH and LWR to the positive Qnet anomalies are less than 10% and 30%, respectively. These findings suggest that the additional heat gain we see in most of the Adriatic during EMSs, compared to normal conditions, is attributed to SWR (net) anomalies. In limited areas across the Adriatic where we see Qnet anomalies of nearly zero, even negative values, it is the LH that systematically forms these values.

In contrast, in the southern-central basin along the African coasts, the negative Qnet anomalies are due to the LH flux. The contribution of LH flux there exceeds 100%, while the positive SWR anomalies correspond to a contribution of about -40% that compensates for the extra LH loss. Contributions from the negative SH and LWR anomalies in this area are less than 15% and 30% respectively.

We have included such numerical values to support the comparison of the different variables in the already discussed areas in Sect. 3.3.1. We believe that it is not necessary to include a figure mapping these percentages for the Qnet components (as they are actually the existing anomaly maps divided by the Qnet anomaly).

As regards the structure of Results section, please see our previous answers in C10 and C13.

#### **C17.**

**Lines 495-496:** *“Negative MLD anomalies in the western part of the Gulf of Lions also imply wind-induced mixing reduction in the vertical (Fig. 7f,g)”*. First of all, I am not sure whether the MLD anomalies shown in Fig(7g) can be directly compared and linked with the anomalies of the rest of the Fig.7 figures. According to the caption of Fig.7 all the anomalies were calculated relative to the 1950-2020 period, whereas the MLD ones were based on the 1987-2019 period. Does that mean that the MLD anomalies were also computed for the EMS summers with respect to the non-EMS summers of 1987-2019 or that the writers simply created a climatology of the MLD for 1987-2019 and then computed the anomalies? Clarify. In any case, the comparison of anomalies between 1987-2020 and 1950-2020 is not advisable since the period before the 1987 encompasses a lot of the non-climate change signal. The writers should compute the anomalies of all the variable for the same period in order to be able to substantiate any claims on the link between the spatial distribution of wind and the rest of the air-sea heat flux variables. At the moment, there is no point in connecting these fields between them as their anomalies depict different things here.

MLD anomalies were computed by subtracting the mean climatological summer MLD value from the mean EMS value (averaged over the 4 EMSs). The difference here is that the considered climatological period is shorter than the entire study period (1987-2019 vs 1950-2020). We agree that comparing anomaly maps computed based on different climatological periods (e.g., wind speed VS MLD) is not statistically sound. However, we have checked that this not significant in our case: we have produced anomaly maps of the examined variables based on the same clim period as MLD (1987-2019). We show below these anomaly maps for Qnet, latent heat and wind speed (as they are often discussed together in the text) computed based on the entire study period (left, as in the manuscript) and based on the same period as MLD (right). Anomaly maps for the two cases are very similar, therefore we believe that showing the MLD anomalies relative to a different climatological period does not affect our conclusions. We have added a short note in the revised manuscript reporting that we have examined the impact of using a different reference period for MLD.

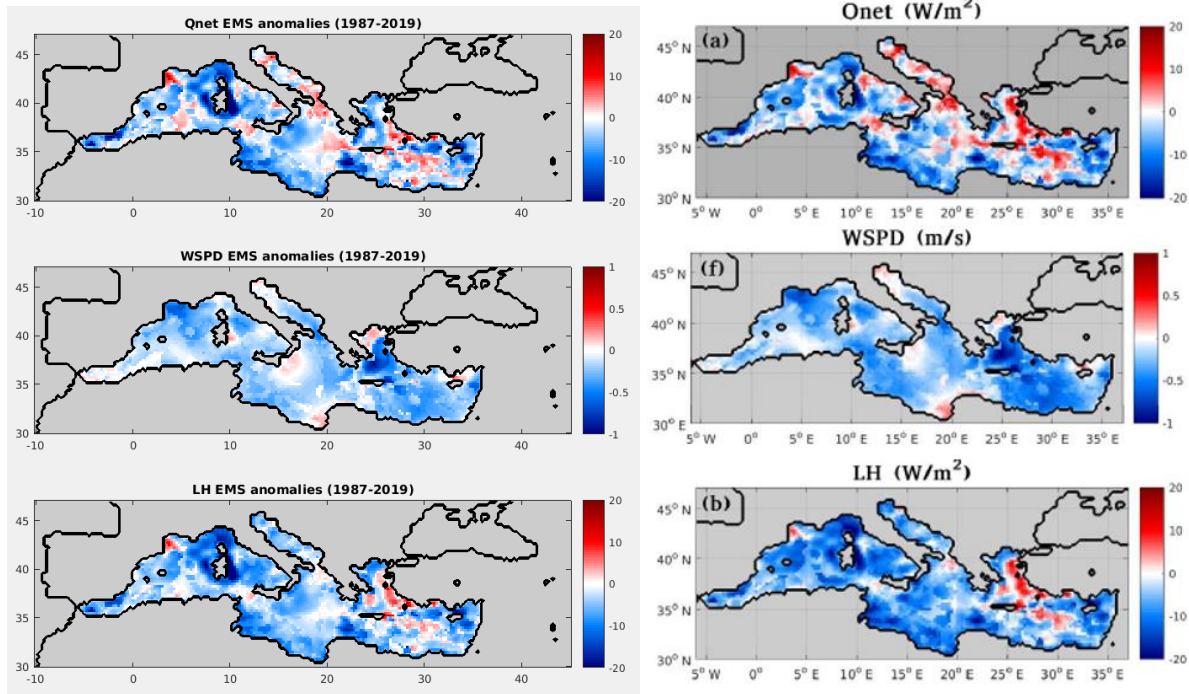

### C18. Discussion:

- Currently there is no Discussion section in the paper and Results section contains comments which could belong to the discussion section of the paper. The entire paper needs restructuring as well as re-writing with the help from a native speaker.

Thank you for this comment.

On the structure of the paper, please see our answer in C10 and C13.

As regards any language issues, please note that the paper has been revised accordingly.

### Minor Comments:

Hereafter we provide a specific answer under every comment, if a question is raised or if clarifications are needed. Otherwise, please note that your suggestions and corrections (e.g., re-wording) have been carefully taken into account in the revised manuscript.

### Abstract:

**C19. Line 6:** Suggestion to re-write: *"The Mediterranean Sea (MS) has been experiencing significant surface warming, particularly pronounced during the summers when? Which years?] and, which was associated with devastating impacts" to (on what?where? Ecosystems? Society?)"*

Thank you for this comment. This sentence aims to report that warming trends in the basin are greater during summers compared to other seasons, not compared to other summers. This will be clarified in the revised abstract. Also, devastating impacts "on marine life" has been specified.

**C20. Line 9:** What does “*SST substructure*” mean here? For someone that reads this term the first time in the abstract it is not clear. Maybe write it differently?

Thank you for noting this. Substructure of extreme summers is a statistical characterization for the way daily SST values are organized over the duration of these summers. The revised abstract properly introduces the term, explaining that by investigating SST substructures of EMSs we aim to reveal which part of the SST distribution is primarily responsible for the EMS, i.e. if these summers result primarily due to the warmest or the coldest part of the distribution being warmer than normal.

**C21. Line 10:** “...*identified in most of the basin...*”. Do the writers mean that the EMSs appear more often covering a large area of the Mediterranean basin at the same time or that EMSs usually occur in many of the sub-basins of the Med.Sea (but not simultaneously necessarily)? Better to rephrase this sentence.

Thank you for noting this. It is indeed not clear. We mean that the reported finding applies to the greatest part of the basin. It will be rephrased as follows: *Results show that, in most of the basin, EMSs are formed primarily due to the higher rank days (i.e., warmer days) being warmer than normal.*

**C22. Line 11:** When the writer refers to “*ranked daily SST*”, ranking can be anything and relative to different things. Here it is not explained what kind of ranking is used. It is a bit of a vague statement.

Thank you for this comment. In the revised abstract, we used the term SST distribution (instead of *ranked daily SST distribution*) in the abstract, as more details on the ranking method are presented in methods.

**C23. Line 13:** “...*and more frequent than usual...*”. Does “usual” mean relative to the climatology of the summer MHWs or the climatology of the summer period used to define the EMS (which by the way it is not mentioned and it need to be given as an information)? Also “...*mainly in the northern MS regions.*”

Thank you for this comment. In the sentence “*Marine heatwaves within EMSs are more intense, longer lasting, and more frequent than usual*”, usual means the normally expected MHW conditions for that period of the year, i.e., the mean summer MHWs conditions within the entire period 1950-2020.

**C24. Line 14:** “*However, the relative contribution of MHWs in EMSs is more pronounced in the central and eastern basin*”. In the previous sentence the writers mention the characteristics of MHWs, which are more pronounced in the northern part of the basin during an EMS period. This sentence however, refers to a contribution (what kind of contribution is this?) of MHWs in the EMS, which is a bit confusing that is more pronounced in a different part of the basin. Also, by definition of “Extreme Marine Summers” one can understand that EMS is a different type of MHW and this sentence refers to a contribution of MHW to the EMS? It is a bit confusing. Consider rephrasing it.



Thank you for noting this, this sentence has been corrected, also including relevant results for MHW days (please, see our answer on MHW days analysis in C15 and the revised abstract). The revised text clarifies on the basis of which MHW property we report enhanced MHW conditions during EMSs.

**C25.Line 17:** “Upper ocean preconditioning is *also important for the EMS formation.*”

Line 20: “...regardless of *the* long-term trends”.

### **Introduction:**

**C26.Line 22:** “*The global ocean.*”. The end of this sentence needs a citation.

**C27.Line 23-24:** “*..Environmental and societal implications –current and projected in the future– underline the need for continuous ocean monitoring and deeper understanding of the ocean climate, in terms of natural variability and anthropogenic climate change*”

could be re-written as:

“The current *environmental and societal implications highlight the need to improve our understanding of the anthropogenic forcing influence on the ocean climate through continuous ocean monitoring*”.

**C28.Lines 25-30:** These lines could be re-written and re-arranged as shown :

“*The Sea Surface Temperature (SST) is a fundamental climate variable and global climate change indicator. A rapidly growing literature has shown its key role in the intensification of atmospheric/oceanic events and processes, e.g., heavy precipitation events (Pastor et al., 2015), surface air temperature variations (Xu et al., 2019), MHWs under global warming (Frölicher et al., 2018), increase in global wave power (Kaur et al., 2021). More importantly, SST is the oceanic parameter that regulates air-sea energy exchanges, reflecting the role of the ocean’s thermal inertia (Deser et al., 2010).*”

**C29.Lines 31-44:** I am not sure if such a long overview of the SST trends is needed in this introduction. I would better save the information for comparison with the paper’s result in the discussion section. The writers could very briefly give a range of the documented SST trends from all the literature and continue with the paragraph of lines 45-49.

**C30.Lines 47-49:** The sentence could be re-written as: “*The high-emission scenarios (SSP5-8.5) of the CMIP6 multi-model projections suggest an SST increase of 0.8° C to 3.5° C in the near- (2021-2040) and long-term (2081-2100) 21st century, respectively, relative to 1995-2014 (Iturbide et al., 2021).*”

**C31.Line 57-59:** “*.. By that time, AMO has entered a declining phase, in agreement with the observed upper ocean cooling in the Atlantic that reversed the previous warming trends (Robson et al., 2016)*”. Previous warming trends of the Atlantic or the Med.Sea?Not clear.

Thank you for noting this. We will specify in the revised introduction that we refer to the Atlantic.

**C32.Line 65:** Instead of “*...warm extreme oceanic events such as Marine Heatwaves (MHW), have attracted great research interest...*” better to write: “*..extreme warm ocean temperature events, such as Marine heatwaves have gained great research interest..*”

**C33.Line 66-71:** These sentences could be re-written as: “*Over the past decades, an increased MHW intensity and frequency have been documented based on observational and modelled SST datasets, (Oliver et al., 2018; Holbrook et al., 2019; Darmaraki et al.,*

2019a; Juza et al., 2022; Pastor and Khodayar, 2023; Dayan et al., 2023). Further increase of MHWs trends is expected at a global and Mediterranean scale over the 21st century (Oliver et al., 2019; Darmaraki et al., 2019b; Plecha and Soares, 2019; Hayashida et al., 2020), due to anthropogenic forcing and especially under high-emission scenarios (Oliver et al., 2019).”

**C34.Line 73:** “...warming trends and warm extremes is highly motivated by their detrimental impacts...”

**C35.Line 79:** “...Climate-related local extinctions..” of what exactly?

**C36.Line 84:** “Summer periods are of particular interest as they are associated with greater surface warming both in present and future climate studies”. The greater surface warming is a given on summers of any time period (past or future). The reason behind the interest in summers is that this elevated warming has profound effects on marine ecosystems/communities and not because it is associated with elevated warming in current and future climate studies.

Thank you for your comment. This sentence aims to highlight that surface warming trends for summers are greater compared to other seasons, which is a motivating factor for focusing on the summer season. We agree that the primary motivation for studying warm water conditions in a warming Med. Sea context is their impacts on marine life. This is why the Introduction includes a dedicated paragraph (lines 72-82). To avoid such misinterpretation, we will rephrase this sentence as follows: “Summers are of particular interest as they are associated with greater surface warming trends, compared to other seasons, both in present and future climate studies”.

**C37.Line 85:** “...Actually, tThe Mediterranean warming rates calculated..”

**C38.Line 86:** “”..Additionally, Indeed model projections suggest that that maximum SST increase is expected in summers”. Are you referring to the Med.Sea or to the ocean in general? Better to remain consistent and talk about the Med. Basin.

Thank you, we refer to the Med. basin. Information on the past/future trends of SST and MHWs (and impacts of ocean warming) in the Introduction refer only to the Med. Sea in the revised manuscript.

**C39.Line 87:** “..Moreover, summer MHWs present the highest SST anomalies (Gupta et al., 2020) and are associated with a stronger ecological footprint (Oliver et al., 2019)”. Is this true on average for the global ocean or the Med. Sea? Better to build the argument behind the choice to investigate summer SST anomalies based on similar facts/studies about the Med.Sea.

This is true for the global ocean (the cited papers study the global ocean), but this is also true for the Med. Sea. Please, see also C39.

**C40.Lines 84-92:** Too many sentences with too many connecting words (e.g. Additionally, moreover, In addition etc). It is like similar arguments are being “thrown” one after the other but without forming a clear argument on the importance of summer SST. Re-write this paragraph, maybe starting with the reasons of summer SST importance step by step.

Thank you for your comment. The paragraph has been re-written in a clearer way.

**C41.Lines 94-95:** “*Considering the above, we propose the concept of extreme marine summer (EMS), from an ocean perspective, and we put our effort to explore here Mediterranean EMSs in a climatological framework.*”What do you mean by the climatological framework?

We investigate extreme summers in relation to climatology. We show and discuss the deviation of each examined quantity in EMSs (SST distribution, MHWs, drivers) from the climatologically expected summer conditions. This has been rephrased in the revised Introduction as follows: [...]to explore here Mediterranean EMSs in relation to summer climatological conditions.

**C42.Lines 96-105:** The entire paragraph here needs re-writing (preferably with help from a native speaker). Also it does not belong to the introduction, rather it belongs to Methods as it describes in detail the concept of EMs. Also when the writers talk about the mean summer SST, which years have examined? It is not stated.

Thank you for this comment. Mean summer SST is computed for all years within 1950-2020, at each grid point. These are the timeseries we use to detect EMSs. This is now clear in the revised text. An updated presentation of the EMS concept and motivation for the study is included in the revised Introduction, and a clear EMS definition along with a step-by-step explanation of the EMS detection process is provided in the revised Methods Section, based on our answers in C3 and C8.

**C43.Line 100:** “*..due to uniformly increased SST values throughout its duration..*“. What do you mean by *uniformly increased SST*? If we are in a EMS then it is a given that the SST values are going to be elevated throughout its duration, no? So what is the uniformly about?

Summers are detected as extreme based on their mean summer SST, without taking into account how SST values are distributed during the season. Different parts of the SST distribution may be anomalously warm, leading to a mean seasonal SST above the EMS detection threshold. A uniformly elevated SST throughout the duration of a summer may be responsible for making the summer extreme, but it is not a given.

**C44.Line 101:** “*...due to warmer SSTs of extreme events alone. This relates to the fact that marine species have..*”. What exactly is related with the marine species here? Not clear.

Thank you for noting this. Investigating SST substructures revealed that for a great portion of the Med. basin, it is primarily the warmest part of the SST distribution during EMSs that is anomalously warm. Marine species do not experience the same thermal stress in any case of elevated summer temperatures. They are, for example, more susceptible to temperature increases if they live in regions close to their thermal limits (e.g., Smale et al., 2019). Therefore, informing on whether the coldest, or the warmest summer days are warmer than normal during extreme summers in different regions in the basin is related to impacts on marine organisms. We have revised this paragraph accordingly.

**C44.Line 104:** “..For instance, animals able to migrate to avoid anomalously warm water conditions lasting for several days may not be able to cope with longer lasting heat stress (Alexander et al., 2018)”. How much longer is the “longer lasting heat stress” from “a warm event whose duration is many days”? I do not understand this sentence. Is the duration of the EMS that differentiates it from the MHW definition and makes it more pertinent to the marine ecosystems? Or is it the change of the uniform SST change or the change in the SST substructures?

Extreme seasons are by definition of fixed duration. The timescale is a critical difference between EMSs and MHWs, which typically last for days. We do not claim that EMSs are more pertinent to marine ecosystems than MHWs. An extreme season is just a different perspective. Please, see also our previous answer. This different perspective, our motivation and a clearer EMS definition are presented in the updated Introduction and Methods sections in the revised manuscript.

**C45.Line 104-105:** “Therefore, even in *the* absence of extreme SST values or extreme warm events, a summer season may present extreme mean conditions thereby strongly affecting marine life.”. How can a summer present extreme mean condition if the SST is not extreme and there is no extreme warm event?Confusing.

The characterization of extreme seasons is based on their mean seasonal SST, without taking into account how SST values are distributed during the season. Extreme daily SST anomalies may be responsible for an EMS, as they increase the mean seasonal SST, but this is not necessarily the case. Elevated SSTs during the summer without the occurrence of extreme daily SST values may lead to a mean seasonal SST above the EMS detection threshold.

**C46.Line 106:** “An EMS may arise due to elevated SST anomalies taking place over the summer duration.. period”. What do the writers consider here as summer duration? June-August? May- September? Not specified. Also elevated SST anomalies..don’t already mean..”favoring of initial thermal conditions”, since there is already a positive temperature anomaly?Otherwise the writers need to explain what they mean by “initial thermal conditions”.Also the period examined is nowhere to be found.

Thank you for your comment. The period July-August-Sep (JAS) has been considered as marine summer season in the manuscript. This choice has been explained in Methods, and we have specified this also in the revised Introduction.

The occurrence of an EMS is potentially favored by preconditioning. In that case, the summer begins (at 01 July) with an already increased SST compared to climatology. This in turn will affect (to a certain extent, depending on the atmospheric and oceanic conditions from that day onwards) the mean seasonal SST based on which EMSs are identified. The paragraph has been revised also according to our explanations in C47.

**C47.Lines 107-110:** “The former may result from the interplay of atmospheric and oceanic factors, being the air-sea heat exchanges (turbulent and radiative fluxes), horizontal (Ekman and geostrophic currents) and vertical (entrainment, Ekman pumping) advection (Deser et al., 2010 and standard oceanography references therein)”. There is always an

interplay between the atmosphere and the ocean, whether there is an EMS or not. Perhaps the writers meant the EMS emerged due to specific atmospheric and oceanographic conditions in the basin? Also if the former (SST anomalies) may be due to air-sea interactions, the latter (favoring initial thermal conditions) may be due to.. what?

On the air-sea interplay:

As you note, the atmospheric and oceanic processes we mention are potential drivers of any SST anomaly, not only of the elevated anomalies observed during EMSs. This part was included in the Introduction as a baseline knowledge on what generally drives SST variations, thus also the SST evolution during EMSs. Later on, we propose a new approach to quantify the role of air-sea heat fluxes in the EMS formation ( $P_{EMS}$  metric presented in Methods). This approach is conceived aiming to take into consideration that the role of air-sea interplay in forming SST changes is a given. This is why this specific task focuses on the most important SST changes for the EMS formation, rather than any normally expected SST variations during a summer.

On the initial thermal conditions: Investigating what forms the initial thermal conditions (pre-conditioning), i.e., why the mixed layer before an EMS is warmer or colder than climatologically, falls out of our objectives. The term “initial thermal conditions” is now removed from the revised manuscript following your recommendation in C66 (we refer to upper ocean preconditioning instead).

The paragraph has been revised taking into account C46-48 and C66.

**C48.Lines 111-112:** *“Several studies focusing on the Mediterranean SST variability have shown the crucial role of the air-sea heat fluxes in the Mediterranean SST variability and observed warming trends in particular has been shown in several studies (e.g., Skliris et al., 2012; Shaltout and Omstedt, 2014)”*. Is this paragraph devoted to the drivers of an EMS or to the motivation behind the investigation of the air-sea heat fluxes? This paragraph needs to be re-written and its content has to be more clear.

**C49.Lines 113:** *“In this context, an extra focus is put within this study aims to on understanding what is the driving role of air-sea heat fluxes in the formation of EMS”*.

**Methods:**

**C50.Line 129:** *“This is a dataset corresponds to foundation SST (SST free of from diurnal variations) SST product and derives from a combination of the HadISST2 and OSTIA datasets. Atmosphere ic variables from the ERA5 product are also...”*

**C51.Line 129-130:** *“... 10-meter wind speed, net shortwave, longwave- and long-wave radiation as well as at the sea surface, latent and sensible surface heat fluxes, total cloud cover, and specific humidity.*

**C52.Lines 133:** *“All fields have a grid spacing of  $0.25^{\circ} \times 0.25^{\circ}$  in longitude and latitude and are provided in hourly time intervals.”*. Are you using hourly time interval in the study or not? If not, better to talk about the timestep you are using the datasets in the study. Also better to re-write the sentence and merge it with a previous sentence like this: *“This is a free from diurnal variations SST product derived from a combination of the HadISST2 and OSTIA datasets, with a  $0.25^{\circ} \times 0.25^{\circ}$  spatial resolution, processed in a daily/monthly/hourly timestep”*.

**C53.Lines 134-136:** *“In addition to ERA5 (reference SST dataset), we use the CMEMS L4*

*satellite SST product (EU Copernicus Marine Service Product, 2022c) for the period 1982-2019, at 0.05°x0.05° grid spacing, to cross check the quality of the reference dataset against a high-resolution observational SST dataset, we also use the CMEMS L4 satellite SST product (EU Copernicus Marine Service Product, 2022c) for the period 1982-2019, at 0.05°x0.05° spatial resolution”.*

**C54.Lines 135-138:** Is the CMEMS MLD different from the mixed layer thickness production extracted from the CMEMS reanalysis? Why are they mentioned twice? Confusing.

Thank you for noting this. There is no actual difference, mixed layer thickness is the name of the variable in the CMEMS product. Only the term MLD is now used in the revised manuscript, to avoid confusion.

**C55.Line 145:** “After identifying EMSs, we apply the methods of Röthlisberger et al. (2020) to assess the associated SST substructures at each..”. What is an SST substructure? Clarify.

Substructure of an extreme summer is a statistical characterization for the way daily SST values are organized over the duration of the summer. In Line 99-101 [*A marine summer...alone*] we further explain the term. Please, also see our answer in C20.

**C56.Line 154:** “The example of Fig. 1a shows for a certain grid point that the summer of 2003 has been entirely warmer than..”. When the writers say “entirely warmer than” do they mean that the entire SST distribution is anomalously warm (and not only the extreme percentiles)? Then they should define somewhere in the methods that they are looking at the SST distribution moments and their anomalies instead of using words like “entirely”.

Thank you for this comment. Figure 1 shows that the entire SST distribution is anomalously warm, as every single day presents higher SST than climatologically. This is observed in all sub-figs of Fig. 1. Figure 1a shows the daily SST values from 01 Jul to 30 Sep, with every single one being above the climatological daily value over 1950-2020. Fig. 1b shows the same summer days but ranked, from the coldest to the warmest. We see that every rank day is above the mean of that rank day over 1950-2020, therefore all rank day anomalies (RDA) for this summer are positive. This summer is entirely warmer than usual, but this does not imply that every part of the SST distribution contributes equally to the mean seasonal anomaly.

We explain this part in the revised manuscript as follows: “RDAs in this example are larger for the higher compared to the lower rank days, suggesting that this summer has become extreme, in terms of mean summer SST, primarily due to the warmer summer days being warmer than usual”

**C57.Line 155-156:** “RDAs in this example (Fig. 1c) are much higher for the higher rank days, suggesting that this summer is identified as extreme primarily due to the warmer summer days being warmer than usual”. By looking at Fig.1c I see all the days of 2003 being anomalously higher than the average ranking between 1950-2020. All the days have ranking anomalies ranging from 1-3 C. Is there any criterion based on which you decide that the 3C ranking anomaly is the one primarily linked to the 2003 warming? I see all days having an anomalous contribution. So I am not convinced that the warming of 2003 was due to only the warming of the warmest days. The warmest days have the

highest anomalies but does that mean that the anomalies of the rest of the days did not play a role in the 2003 warming? I do not understand.

Please, see also our previous answer (C56). We do not claim that the warmest rank days are the only responsible for this EMS. But we consider that the most responsible part is the one that presents the greatest SST anomalies, thus accounting for the greatest part of the seasonal SST anomaly. This is the criterion we follow to attribute the “extremity” of a summer to different parts of the SST distribution. Please, note again here that EMSs are detected based on mean summer SSTs. Our approach to divide the SST distribution into two parts (coldest/warmest) serves to reveal which part is primarily responsible for the mean summer SST. This does not mean that there are not elevated SST values in the other part.

We strongly believe that the updated definition of EMS along with the additional information on the rank day anomalies methodology in the revised manuscript will ensure that the points you raise will not remain unclear.

**C58.Section 2.2.2:** This section should be merged with Lines 143-145 since it is part of the EMS definition. Without this part the readers get confused with the EMS definition which is currently scattered here and there.

Please, see also C7. As noted there, we agree that the EMS definition and the fact that we detect and investigate EMSs both in the original and the detrended dataset should be explained within the same section. We have merged these parts in the revised manuscript.

**C59.Figure 2 caption:** Better to give the lat/lon coordinates used to split the Med. Into the different sub-basins instead of saying “Strait of Sicily up to 22E”. The science must be reproducible, therefore, the exact coordinates of the subregions should be mentioned in the captions or in the description of the Methods. Also, the legend for the detrended SST timeseries in panel (b) says “*Med SST anomaly*” which is confusing, as usually the SST anomaly refers to the SST difference from the climatology. Better to just refer to the timeseries as “detrended summer SST”. The zero line does not need a legend. It is evident.

By stating “*Strait of Sicily up to 22°*” in the legend of Fig. 2, we do not imply the separation of WMED and CMED through a straight line of constant longitude at the Sicily Strait. We mean the strait itself being a natural boundary separating the 2 sub-basins, as shown in the following figure. This is now clear in the revised document.

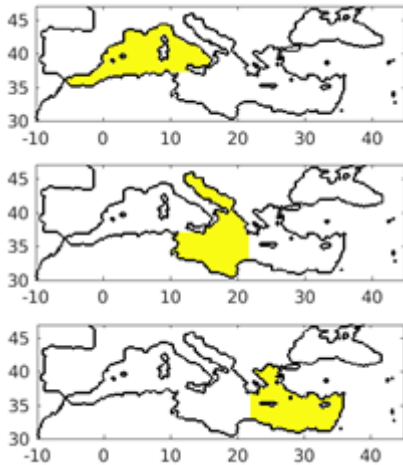

**C60.Line 171-172:** Better to decide to use either past or present tense in the study. Currently some sentences are in past and other in present which is confusing.

**C61.Lines 175-179:** This paragraph may well belong to the introduction where the writers should give a brief overview of the EMSs and their added value. However, if the writers removed the signal of the multi-decadal SST oscillations how did they also remove “*any long-term variability of the Mediterranean SST*” apart from the multi-decadal oscillation one? Did you do an additional de-trending of the SST timeseries or does this refer to the multi-decadal signal? Clarify. This is confusing for the reader.

**C62.Line 178:** “...into the actually warmest EMSs and...”

**C63.Line 191:** “...Therefore, such discrepancies resulting from different climatological periods are not considered significant in the scope of the present study”. What kind of discrepancies do you mean here? Do you test different climatology periods for the detection of MHWs? Why is this information relevant for the study?

Thank you for this comment. CMEMS satellite SST was additionally used in many tasks performed to investigate EMSs, in the context of ensuring that the reanalysis produces similar results with the observations. As the common period starts from 1982, we decided to use a 30-year climatology (common approach for MHW detection) starting at 1982, allowing for inter-comparing results from ERA5 vs CMEMS. However, to examine if a different climatology would significantly alter the resulting MHW properties from the ERA5 dataset, we also tested other climatological periods. Results showed some differences in the computed metrics which were considered not significant considering the objectives of this section. Here we investigate potential changes in main MHW characteristics during extreme seasons. If we aimed to provide a thorough discussion of MHW properties within 1950-2020, testing the impact of using different climatologies would be highly relevant to that objective. We considered adequate to provide this short explanation to the reader as the sensitivity of MHW-related findings to different choices for climatological periods used in MHW detection is widely discussed within the MHW community.

**C64.Lines 192-195:** “...In addition, the availability of satellite SST data during the selected climatological period....to detrended SST data”. All these sentences need to be re-phrased with help from a native English speaker. Also, what is the point of mentioning the



comparison between the MHWs detected using ERA5 and those using satellite if a) the comparison is not shown anywhere and b) the results from their comparison are not used anywhere else in the study?

Please, see also our previous answer in C63. CMEMS satellite SST was additionally used in many tasks (e.g., rank day anomalies methodology, MHW detection) and results were inter-compared with the ones from the ERA5 dataset for the common period. Although we considered such tests a necessary pre-processing task, we opted not to present these results as they fall out of the paper's objectives and also to avoid increasing the length of the manuscript. The point of mentioning this comparison is to report that, at least for the recent decades, the utilized reanalysis dataset is able to produce similar results with the observations. Differences fall within acceptable ranges, considering that we inter-compare modeled against observational SST. Lines 193-194 already report that results (not shown) from inter-comparison of ERA5 against CMEMS SST revealed a satisfactory level of similarity. We provide below an example of MHW detection at a location in WMED using the two datasets:

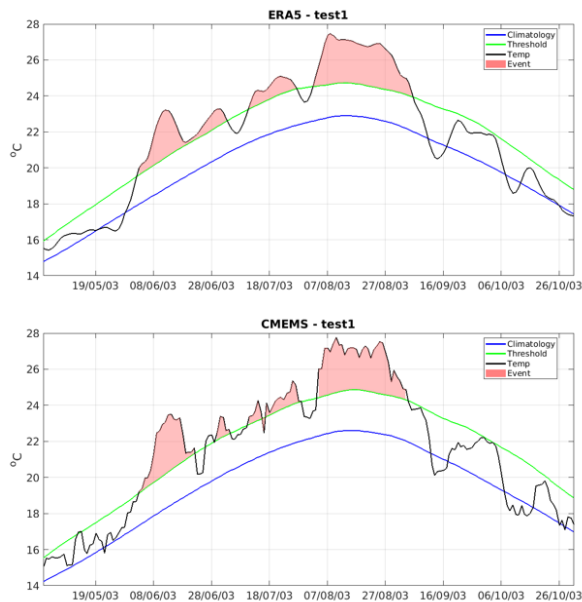

As regards other tasks repeated using satellite SST, C14 includes an example of applying the methodology to reveal SST substructures in EMSs based on both datasets.

**C65.Line 204:** *“To investigate the role of surface heat fluxes during EMSs, we first compute the mean anomaly of EMS  $Q_{net}$  and its components with respect to their mean summer value over the study period...”*. What do the writers mean here by computing the “mean anomaly of EMS  $Q_{net}$  with respect to the mean summer value? When one computes an anomaly and takes its average in time, then this process goes back to the mean value from where the anomalies were created. Clarify.

Thank you for your comment. We compute EMS anomalies aiming to compare extreme summer conditions against mean summer conditions. We compute EMS anomalies for any variable in the manuscript by subtracting the mean summer climatological value of that variable from its mean value over the 4 locally detected EMSs. So, the mean EMS value is the average over the 4 EMSs

at each location. This mean EMS value represents the EMS conditions (in terms of the examined variable) at that location. It is from this value that we subtract the climatological mean (average over all summers) to obtain the EMS anomalies.

**C66.Line 217:** *“Apart from the contribution of positive SST anomalies during the season, warmer than usual initial conditions may also favor...”*. It is better to avoid using “initial conditions” since the writers are talking about upper ocean preconditioning in this section. The phrase “initial conditions” usually refers to initial conditions e.g. of a climate model etc. The entire section here, in fact, talks about the contribution of the ocean heat content to the EMS development whereas the previous is simply describing the atmospheric contribution. This is a common method to investigate drivers of extreme warm temperatures in the ocean, therefore the terminology should just refer to atmosphere and ocean heat contributions (or upper ocean preconditioning).

**C67.Line 222:** *“... and the corresponding EMS anomalies (June before an EMS – mean June for all years) at each grid point..”*. Better to write this as an equation instead of using words.

**C68.Line 228:** *“To overcome any unfair OHC inter-comparisons due to different integration depths..”* Rephrase.

#### **Results:**

**C69.Line 239:** What is the reason behind the choice of these particular 3 points whose SST substructures are investigated? Why not other points of the MS ?Is it random?Justify if not. Also, what is the period examined and represented by the grey lines? Currently we are only aware of the EMS years from the Figure legends. Caption needs to mention the entire period examined.

By including Fig. 4 we aim to provide the reader examples of SST distributions for different summers, as such information is “hidden” in the fields of Fig. 3 that include averages over the local EMSs.

The selected locations serve as examples for different patterns of SST distributions during EMSs. At the location in WMED the warmest half contributes the most to the seasonal SST anomaly in all EMSs, although the shape of the SST distribution varies significantly among the EMSs. The location in the Levantine Sea again shows a greater contribution of the warmest part to the seasonal anomaly, but SST distributions here are more similar among the local EMSs. The location in the southern-central basin shows a greater contribution of the coldest part of the SST distribution during every local EMSs.

All sub-figures refer to the entire study period 1950-2020 and gray lines stand for non-extreme summers within this period. This has been specified in the legend.

**C70.Line 241:** *“Regardless of the variability..”*

**Figures 3 & 4:** What is the (K) in the titles and y axis label of Figures 3a) and 4a) respectively? Also panel 4 somehow is described as a whole before panel 3 of figures. I would suggest moving Figures 4 as Figures 3 and then describe the maps currently named as Figure 3, since anyway their description is now interrupted from the description of Figures 4.

**C71.Figure 4.** The caption of the figure is missing the reference to plots d,e,f. They are only referred to as bottom row. They should be referenced together with the top row. e.g. a,d) southern of the Gulf of Lions (...) etc.

**C72.Lines 266-267:** “To gain insight into the SST substructures over the basin, Figs 3b and 3c show the fractional contributions of the warmest and the coldest half of the RDA to the formation of EMSs”. What do you mean by “warmest and coldest half”? Which ranks are the warmest and coldest ones out of the distributions shown here? Not clear. This is important in order to also understand the contribution maps of Figure 3. Also, what is the contribution of the middle ranks? The ones which are not too cold or warm? And how is the contribution calculated? Relative to what quantity? This is not clear.

- The description of Figures 3d-f comes later in Section 3.1.3 and after the description of Figures 4 & 5 which is confusing for the reader. It seems ad-hoc and the reader has to scroll up and down the manuscript. The description of the figures should be done sequentially. So section 3.1.2 should come after section 3.1.3

On the SST substructures: Please, see our relevant answer in C4. As clarified therein, the warmest and coldest half of the RDA distribution range from the 1<sup>st</sup> (i.e., the coldest) to the 46<sup>th</sup> rank day and from the 47<sup>th</sup> to the 92<sup>nd</sup> (i.e., the warmest) rank day, respectively. On the middle part, please see our answer in C14.

On the description of figures: While merging the 3.1.1, 3.1.2 and 3.1.3 sections (in a single 3.1) following your suggestion, we also rearranged the presentation of results. In the way results are now structured within the revised Sect. 3.1, the figures are described sequentially. We believe that this change has really improved the text the document’s flow.

**C73.Line 275:** If the variance of the RDA is calculated following the standard mathematical equation,  $Var = (RDA - \text{mean RDA})^2 / (\text{number of summers})$ . Are the writers sure that this quantity applied to the anomalous field does not bring the Variance back to the mean? And probably this is why the maps of Fig5 resemble a lot the maps of Figure 3? Why did the writers choose the variance and not the standard deviation?

Thank you for your comment. By definition, the mean of the RDAs equals to zero. Therefore, the variance of RDAs computed for the 71 years reduces to the following:

$$Var = \frac{1}{71} \sum_{s=1}^{71} \frac{1}{92} \sum_{d=1}^{92} (RDA_{d,s})^2$$

which is an adequate measure of variability for RDAs, representing their spread. The fractional contribution from the coldest/warmest part of all summer days to Var are computed as follows:

$$VContr_{coldest} = \left( \frac{1}{71} \sum_{s=1}^{71} \frac{1}{92} \sum_{d=1}^{46} (RDA_{d,s})^2 \right) / Var$$

$$VContr_{warmest} = \left( \frac{1}{71} \sum_{s=1}^{71} \frac{1}{92} \sum_{d=47}^{92} (RDA_{d,s})^2 \right) / Var$$

The same statistical approach has been employed by Röthlisberger et al. (2020) to interpret the substructures of extreme (atmospheric) summers in relation to climatological variability. On the similarity of the fields Fig. 5 vs Fig. 3, please see our answer in C77.

The above equations are now included in Methods, and references to them are provided within the text, where needed.

**C74.Lines 279-280:** “Results come in agreement with Shaltout and Omstedt (2014) who *that examined the SST variability...*”

**C75.Lines 279-281:** “Results come in agreement with Shaltout and Omstedt (2014) who examined the SST variability in the basin showing that the maximum and minimum seasonal stability are found close to the southern Levantine sub-basin and the Gulf of Lions, respectively.”. This type of comments belong to the discussion and not in the result section.

**C76.Lines 282-283:** “We then calculate the fractional contribution of the coldest and the warmest half of the ranked summer days to the RDA variance for all 71 summers (Figs 5b,c)”. Again which ones are the warmest and coldest half of ranked summer days, you need to name them. Otherwise it is vague. Also how do you calculate this contribution? Not clear.

Please, see our answer in C73.

**C77.Lines 286-287:** “In other words, the locations where the warmest (coldest) part of the rank day distribution has higher spread, experience EMSs primarily due to the contribution of the warmest (coldest) part of the EMS rank day distribution”. In Figure 5a) I only see higher spread in northwest Med. Sea where there is also a high contribution from the warmest and coldest half of rank days (from Figure3). However there is also a high contribution from the warmest and coldest half or rank days in e.g. the north Aegean, where the spread (Fig5a) does not seem to be high. How do the writers explain this? Is their statement here true for all the areas of the Med. Sea?

Thank you for your comment. The sentence “..the locations where the warmest (coldest) part of the rank day distribution has higher spread..” does not refer to the seasonal variance presented in Fig.5a. It refers to the contribution from a specific part (warmest/coldest) of the distribution to the seasonal variance (total variance of summer SST within 1950-2020). The spread of each part expressed as a percentage of the seasonal spread is presented in Figs 5b,c. In both areas you mention (NW Med with the highest and the Aegean with a much lower spread), the warmest part shows higher spread compared to the coldest (Figs 5b,c), not compared to other locations. What we say is that the part presenting the greatest spread over the years at a particular location, is the same part that is the most responsible for the seasonal SST anomaly in EMSs at that location. This is how we interpret the similarity between the fields in Figs 3b,c that refer to EMSs, with Figs 5b,c that refer to all summers (same for Figs 3e,f vs Fig5e,f using detrended data).

**C78.Lines 290:** “At the location at 41.5° N-5° E (Fig. 4a), SST substructures appear particularly different among the EMSs.”.Although this is true I can also discern other years (grey lines) with the “warmest” part of the SST distribution contributing more to the summer temperatures (following the criteria of high values just like the writers). So what is the difference in this contribution with the contribution of the EMS RDA?

Thank you for this comment. The contribution from the two parts to the seasonal anomaly can be computed for any summer. In this work however we detect and explore the warmest summers in the basin. This does not mean that there are no similarities with the rest of the summers as regards patterns of the SST distribution. The non-extreme years are shown here also to illustrate the similarity you observed and that was explained in our previous answer in C78: that the part of the distribution that contributes the most to the EMS anomaly is the part that presents the largest spread climatologically. Please, see also specific clarifications in your following comments.

**C79.Lines 292:** *“This is the part presenting the largest RDA spread in the rest of the years as well (6.7° C and 5.4° C for the warmest and the coldest part, respectively) (Fig. 4a)”*.

Which years? The non EMS or the 3 other EMSs? Not clear. Also, what is the spread? Can you give the variance value?

Thank you for this comment. The rest of the years in the context of this sentence are the non-EMS years (gray lines). At this location (Gulf of Lions), the warmest part explains 58.8% of the seasonal variance (i.e., of the summer SST variance computed over 1950-2020). Instead of reporting ranges (maximum - minimum values) of RDAs in the 3 examples, we have reported in the revised manuscript numerical values for the contributions from the two parts to the total variance. This has been done to improve consistency, as variance is the measure of spread presented in the manuscript.

**C80.Line 293:** *“Similarly, at the location at 35°N-28°E (Fig. 4b), the highest rank days which contribute the most to the mean EMS RDA are also the most varying from summer to summer within the study period.”*. There is no location 35° N-28° E indicated in Fig4b. The point 35° N-28° E is located in the central Levantine basin, which according to Fig5b) is characterised by an increased contribution from the high rank days. However, by looking at Fig5a) I do not see a particularly large spread in the area. In fact, the spread (variance) is much smaller than the one shown for the northwest basin.

In case your first comment concerns the reason why we cited Fig. 4b here, we agree that this should better move to the end of the sentence.

For the discussed location in the Levantine Sea, Fig. 5b shows an increased contribution from the higher (compared to the lower) rank days to the seasonal variance (55.8% and 44.2%, respectively). The variance is lower at this location (compared to others, like in NW basin), but this is not what we examine here. We do not compare the variance between different locations. Instead, we juxtapose contributions from the two parts a) to the EMS SST anomalies and b) to the seasonal variance (variance of summer SST within the entire study period). Please, see our clarifications in C77.

**C81.Line 295:** *“The RDA range of the warmest part here is 3.3° C (2.7° C for the coldest part)”*. When “range” is used then two numbers should be given that represent a *range* of what? What do the writers mean something else here. It is confusing.

Please, see our answer in C79. We have shown the range of ranked daily values within each part of the distribution, in terms of maximum - minimum value. This has been replaced with numerical

values for the contributions from the two parts to the seasonal variance, to be consistent within the text.

**C82.Lines 296-297:** “In contrast, at the location 34.5° N-13° E (Fig. 4c), which exhibits greater RDA variability in the first rank days of the RDA distribution, RDA values of the coldest half display a range of 4.6° C (3.5° C for the warmest part)”. Looking at Fig 4c) I see the RDA ranging from 1K – 3K (is this Kelvin or something else?) for the coldest half of the rank days. So where does the “range of 4.6 ° C” come from? Unless the writers mean something else.

Please, see our clarifications in C79.

**C83.Line 299:** “...the part of the RDA distribution that contributes the most to the EMS RDA is the one presenting the largest spread climatologically”. Where is this climatological spread shown exactly? Not clear.

Please, see our clarifications in C77 and C80. Figures 5b,c are the ones that show the contribution from each part to the total variance (computed for all summers within 1950-2020). This is the spread of each part expressed as a percentage of the seasonal spread (i.e., of the seasonal variance shown in Fig 5.a). When we say “the one presenting the largest spread” we mean the spread of one part compared to the other part at a particular location, not compared to other locations.

**C84.Line 300:** “When the multi-decadal trend is removed, smaller SST anomalies in EMSs are found in the entire MS. (Figs 3a,d)”. The anomalies are smaller relative to the climatology but also in comparison with the non-detrended dataset.

Thank you for this comment. The computed SST anomalies are, by construction, relative to a climatology (either in the original or in the detrended dataset). Figs 3a,d show that the deviation of extreme summer SST from mean summer SST is smaller in the detrended compared to the original dataset. We have added “with respect to the original dataset” in the revised manuscript to avoid any confusion.

**C85.Line 306:** “In both fields, RDA peaks are found in the Gulf of Lions and the Ligurian Sea, followed by the Adriatic Sea.” The Results section is where specific numbers should be given. Consider mentioning the the RDA peak numbers you are referring to here. In general a range of values that represent big or small differences in the RDA between the left and right column of Fig3 should be given in the Result section.

**C86.Lines 313:** “In particular, in the detrended dataset, locations where the coldest rank days contribute to the RDA variability more than 50% are not restricted in the southern-central area north of the African coasts as in the original dataset. It is also the central Adriatic, part of the southern Levantine and the north Aegean Seas that exhibit a slightly enhanced contribution of the cool summer days to the RDA variability (Figs 5e,f).”.

Rephrase the sentence and give more representative numbers. The result section is where values should be given, whereas the discussion section is used for commenting on the differences between the numbers of the results section.

**C87.Lines 320:** “To better illustrate this, the SST substructures in the three example cases

discussed above are very similar for the original and the detrended dataset, despite the actual EMSs being warmer (Fig. 4a-c and Fig. 4d-f, respectively)”. The actual EMSs being warmer...than what? Not clear.

Thank you for this comment. Here we compare the actual with the detrended dataset. In the quoted sentence we mean the actual EMSs being warmer than the ones identified using the detrended dataset. We have specified this in the sentence.

**C88.Lines 320-324:** Re-phrase with help from a native speaker.

**C89.Lines 326-329:** “In addition, SST substructures in EMSs seem to be independent of the selected study period. Sensitivity tests performed for different sub-periods show a consistent statistical behavior of the detrended SST dataset compared to the original one (not shown).”. What kind of consistent statistical behavior do the writers mean here? Not clear.

Thank you for this comment. In the previous paragraph (Lines 319-324) we discuss the similarity of the revealed SST substructures between the original and the detrended dataset. These next lines (quoted lines 326-329) aim to report that repeating this analysis based on different study periods results in similar spatial patterns of SST substructures with the analysis based on the entire study period, thus also similar between the two datasets.

**C90.Line 331:** “...EMSs are formed based on a “background: SST substructure field, largely depending on the climatological ranked daily SST variability in the MS”. I thought the SST substructures were represented through the RDA and not the climatological ranking of the daily SST. This sentence is confusing.

Thank you for this comment. SST substructures are indeed represented through RDAs. RDA is the SST anomaly of a rank day relative to the mean climatological value of that rank day. For example, the coldest day of summer 2003 is the 1<sup>st</sup> rank day of this summer. Its RDA is computed by removing from the SST of that day, the mean SST of the 1<sup>st</sup> rank day of all summers. The sentence in Line 331 combines results from the original and detrended dataset. In this context, the word climatological is used to highlight the role of a baseline (climatological) pattern on top of which the multi-decadal signal makes the extreme seasons even warmer.

**C91.Line 334:** “*Analyzing the EMS SST substructures in the previous section revealed that EMSs in the basin are commonly formed due to the warmer summer days being warmer than normal*”. This is not true always, since the example case of the Central Med. Sea (Fig.4c) shows that the EMS develop mostly due to the..coldest rank of days becoming Warmer.

Thank you for noting this. You are right, the word “commonly” does not necessarily imply that it is not true basinwide. We will remind the main exception of this pattern in this sentence.

**C92.Line 336:** “*To complement these findings, this section investigates the role of MHW events during EMSs.*”. Why does the role of MHWs acts as complementary to the EMS? Are the writers sure that there are EMSs without a MHW occurring?

Please, see our answer in C8.

**C93.Line 336-337:** Re-phrase the sentences.

**C94.Line 337-338:** “*Then, we examine the relative role of MHWs in EMSs by means of changes in MHW properties during EMSs (Sect. 3.2.2) with respect to mean MHW conditions*”. Do the writers mean the non-EMS conditions when referring to “mean MHW conditions”? Not clear.

Thank you for this question. No, we mean the mean summer MHW conditions. Please, see our explanation in C15 and C100.

**C95.Lines 359 – 371:** These paragraphs belongs to a discussion section and not to the Results.

**C96.Lines 269-371:** “*This difference is mostly related to our choice to focus on summer MHWs that begin and decay within the JAS summer period. Taking into account all events throughout the year, similar MHW duration values are reproduced (not shown)*”. Do the writers mean that duration of the MHWs would change if the examined period would be between June – August or any other season of the year? What are the similarities of the MHW duration when taking into account all the events of the year? Similarities with the MHW duration of the current study or with previous studies? Not clear.

Thank you for this comment. In lines 367-68 we write “*However, all aforementioned studies report larger MHW durations in the south-eastern MS compared to our results*”. These studies consider events over the entire year. We checked that our metrics change when taking into account all events of the year and the resulting mean duration fields in the basin are then similar with literature. We have clarified in the revised text that here we refer to previous studies.

**C97.Line 374-376:** “*Consequently, they represent the mean seasonal conditions of i) all summer MHWs in the study period and ii) the MHWs occurring in EMS, respectively, both not expected to be indicative of the most extreme MHW conditions.*”. What do the writers mean here by “*both not expected to be indicative of.*”? The mean seasonal conditions are not expected to be indicative of MHW conditions. However the EMS are summers with extreme warm conditions. So why are they not expected to be indicative of MHW conditions?

Thank you for your comment. We write that they are not expected to be “*indicative of the most extreme MHW conditions*”, not indicative of MHW conditions. This is because we average MHW metrics, we do not detect MHWs and pick the most extreme ones. Summer MHW conditions are the mean MHW conditions averaged over the 71 summers of the study period. Analogously, EMS MHW conditions are the mean MHW conditions averaged over the 4 EMSs. Moreover, MHWs are detected in this work based on the 90<sup>th</sup> percentile threshold which is relatively easy to exceed and thus not expected to capture only the most extreme events.

**C98.Lines 377-378:** “*MHWs may promote the formation of an EMS either by being more frequent, of greater duration or of greater intensity than usual, thus, contributing in*



*different ways –not necessarily bearing extreme characteristics– with positive SST anomalies to the seasonal SST being the focus of this study”*. I am not sure the difference between the EMS and the MHWs is properly explained so far in order to understand why the MHWs *may promote EMS formation* instead of being part of/always present when an EMS is happening or how the EMS conditions are differentiated from MHW conditions, or why an EMS cannot promote a MHW instead.

Please, see our answer in C8.

### **Section 3.2.2**

**C99.Line 380:** *“To understand the role of MHWs in EMSs, this section presents the mean EMS anomalies of MHW properties with respect to their mean summer values.”*. The way this sentence is written is confusing for the reader. Does that mean that this section presents the EMS anomalies of MHW properties relative to the mean EMS summer values or relative to the mean summer MHW values?

Thank you for your comment. We compare each MHW property between extreme summers VS climatological summers. Therefore, the EMS anomaly of a MHW property is relative to the mean summer value of that MHW property (mean value of the property over the 71 summers).

**C100.Figure 6:** Does the computation of the mean MHW properties during 1950-2020 include the EMS years in the average or not? Because if the EMS years are included in this average what is the point in creating the anomalies of MHW properties only during EMS years (Figure 6d,e,f)? Clarify.

Thank you for this comment. EMS anomalies for any variable in the manuscript are computed by subtracting the mean climatological value of the variable from its mean value over the 4 locally detected EMSs (EMSs – All). The point is to compare extreme conditions against mean conditions in the study period. By excluding the EMS-years when computing the climatological mean value, we would certainly obtain higher SST anomalies for EMSs, as they would have been computed relative to colder average summer conditions. We believe both approaches are acceptable, but we chose to include all summers as in this way the reference period corresponds to the actually average conditions.

**C101.Line 385:** *“In terms of mean basin values, mean summer MHW intensity equals 1.56° C while when isolating events during EMSs, it drops to 1.45° C (Table 1). This suggests either the suppression of MHWs in EMSs or the existence of alternative mechanisms potentially enhancing the MHW conditions in EMSs.”*. Table 1 shows a basin-mean  $I_{mean}$  of 1.41 ° C instead of 1.45° C. I am not sure I understand how the reduction of  $I_{mean}$  during EMS-MHW conditions can mean either a suppression or enhancement of MHW conditions. What do the writers mean here? What kind of mechanism are they referring to and how this differentiates when there is MHW suppression from MHW enhancement?

Thank you for this comment.

The second row of the Table corresponds to results from the detrended dataset, noted here as EMD (standing for Empirical Mode Decomposition that was applied for detrending). We understand now that this has obviously been confusing, as it highly resembles EMS.

In this part we compare basin-mean values of MHW intensity for MHWs occurring within EMSs (3rd column) against MHW intensity for all summer MHWs (2nd column). As we find a smaller basin-mean intensity in the case of MHWs occurring within EMSs, compared to mean summer MHW conditions, we assume that this is either due to generally weaker MHW conditions during EMSs or that it is only the intensity of events that presents the observed reduction during EMSs. In fact, we see that frequency and duration are increased during EMSs compared to normal conditions, which supports the latter assumption. The anomaly maps of Fig. 6 show that it is over the southern Med. Sea areas where we mainly see the negative intensity anomalies in EMSs (resulting in the reduction of  $I_{\text{mean}}$  presented in Table 1). In the same areas though, the number of events per summer and their duration are greater in EMSs than usual.

Regardless of the above explanation, we have reformulated this small part of the MHW section in order to remove any discussion of basin-mean values. This is suggested following a relevant comment of Reviewer 1 on the interpretation of basin-mean MHW metrics. We acknowledge that such values do not present new information on top of the maps in Fig. 6. For this reason, we have removed Table 1 and the few references to this Table from the MHW section.

**C102.Lines 400-401:** *“MHW analysis of this part further suggests that enhanced MHW conditions commonly contribute to the observed SST anomalies in EMSs”*.. I am not sure that the comparisons of Fig.6 shows this result (see comment of this Section in Major comments). But even if this is true, I do not understand why the MHWs contribute to the EMS conditions instead of being the reason why an EMS is formed in the first place? Also in Lines 407-408 the writers mention: *“This suggests that in this location, the higher rank days which are the most responsible for the EMS formation (Fig. 3b), face more difficulty in producing distinct MHWs”*. Does the EMS create MHWs or the other way around in the end? These two sentences are a bit contradictory.

Thank you for this comment. First, please see also our clarifications on the EMS definition and differences with MHWs in C3 and C8, respectively. MHWs contribute to EMSs (and not the other way around) in the sense that the mean seasonal SST value is formed according to the SST variations throughout its duration. Analogously, a part of the rank day distribution, e.g., the highest (warmest) rank days, may be more responsible than the other part of the distribution for the elevated SST anomalies during a season. In this sense, attributing an EMS to specific parts of SST distributions, or to MHW occurrences comes from the smaller time scales of the latter compared to an entire season (rather than from a direct cause-and-effect perspective).

**C103.Lines 399-415:** These two paragraphs are discussing the same thing and should be merged in one. Either more numbers of the indicative duration and intensities should be given here or move this sentences as part of the discussion.

**C104.Section 3.2.3:**

Although this is a Results section the description of MHW properties gives no numbers. Rather it is limited in comparisons of “greater” or “smaller” magnitude. Either move

these paragraphs to the discussion section offering possible mechanisms behind the results described or simply refer to the differences seen in MHW properties with the detrended datasets using numbers.

**C105.Lines 424:** Apart from the multi-decadal signal being removed is the trend value of the summer also removed here like in lines 170 – 173? Not clear. This information was never mentioned again in the manuscript after the beginning of the paper.

Thank you for your comment. Please, see our relevant answer in C5.

**C106.Lines 426 – 427:** “This suggests the presence of similar event-driving mechanisms and reveals the positive contribution of the multi-decadal signal to the observed sea surface warming, this time specifically via the SST anomalies caused by MHWs.”. How exactly has the positive contribution of the multi-decadal signal to the observed SST warming and (especially through the MHWs) been revealed here if the mechanisms have not changed at all in this and the original dataset? I do not understand. Clarify

When removing the multi-decadal variability the magnitude of MHW intensity reduces but the intensity spatial distribution is remarkably similar between the original and the detrended dataset. These findings may be seen in the figs below (left: using the Original dataset, as in the manuscript; right: using the detrended dataset). These results suggest that the warmer events in the original (compared to the detrended dataset) result from the warming signal included in multi-decadal variability. For this reason we say that the multi-decadal trend contributes to more intense events. The striking similarity in the intensity fields most probably suggests that events are regulated by the same mechanisms, apart from the role of the discussed trend that is related to longer timescales. However, as this has not been investigated and supported in this paper, we have removed the part “suggests the presence of similar event-driving mechanisms” from this sentence.

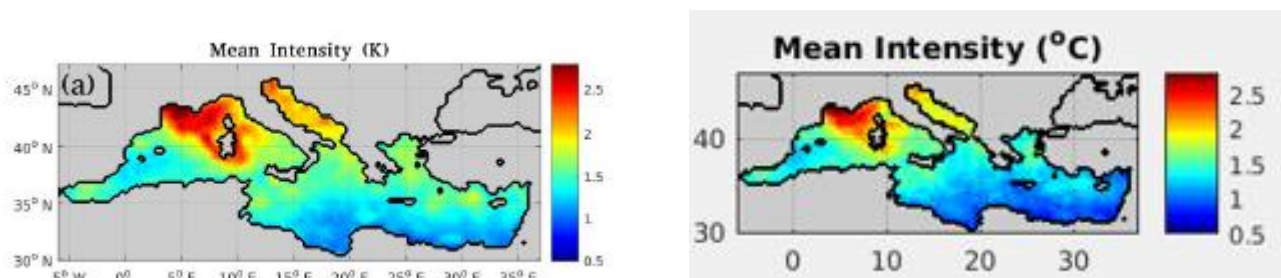

**C107.Lines 432-437:** These are arguments that belong to a discussion section and not to the results as they are commenting on literature and possible explanations.

Please, see our previous answers in C10.

**Line 432-433:** “During EMSs, MHW intensification is greater when using the original dataset. This is more pronounced in the eastern basin and particularly in the Aegean Sea”. Apart from Table 1, Fig. 6 should be cited here as well.

**C108.Table 1:** The categorization in “Orig” and “EMS” is not a good choice of names. Better to find some other names to distinguish between the two datasets used here.

Thank you for your comment. Please, see our answer in C101.

**C109.Line 439:** “Moreover, we observe a similar behavior of MHW properties in the detrended compared to the original dataset” I thought the writers were already talking about the comparison between the detrended and original dataset. So why repeat the argument Here?

Thank you for noting this. Yes, we were already talking about the comparison with the detrended dataset. This sentence refers to a specific behavior, described right next: *longer lasting events in EMSs (compared to the mean state) counterbalance the lower event intensity values in EMS.* However, we totally agree that the way this sentence begins may be confusing for the reader. This will be corrected in the revised manuscript.

**C110.Lines 440:** “...longer lasting events in EMSs (compared to the mean state) counterbalance the lower event intensity values in EMS (Table 1).” \_\_\_\_\_ This sentence is really

unclear. I am not sure where to look in Table 1. Are you comparing the MHW days between the mean summer MHWs and the EMSs MHWs on the Orig dataset or the days between mean summer MHWs and the EMSs MHWs or the duration of events between the Orig and EMD datasets? Clarify. Better to rename the datasets of Table 1 and everytime you compare between them, refer to what datasets you compare. And also, how do you know that longer lasting events are “counterbalancing” the lower intensity? What do you mean by this? Not clear.

Thank you for this comment. Please, see our answer in C111.

**C111.Lines 442-446:** This paragraph refers to which Figure exactly? Not really sure where to look for these results. Is it if Figure 6? Very confusing.

Thank you for this comment. As MHW results based on detrended data are to a great extent similar to the original, we opted not to include them in the manuscript. We note in the manuscript that these specific results are not shown. The relevant figure, being the equivalent to Fig. 6 of the manuscript but based on detrended data, is provided below:

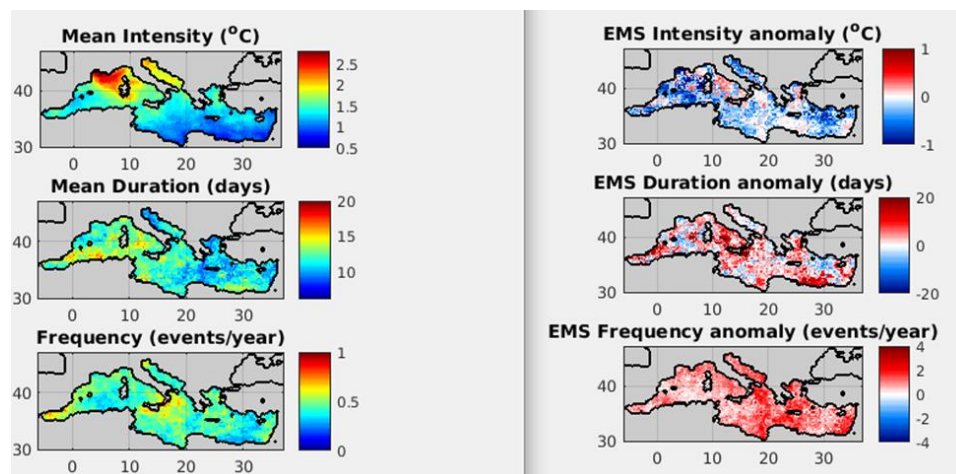

We have replaced this short section (3.2.3) with a very short paragraph reporting that MHW analysis based on detrended data yielded similar findings and briefly noting differences with the

original dataset, without providing any discussion. As the MHW Sects 3.2.1 and 3.2.2 have been merged following your suggestion in C12, this short paragraph has been incorporated into that analysis. As previously explained, the Table 1 has been removed.

**C112.Line 442:** “...in absence of long term trends...”. Why do you need to refer to the absent trends and what do you mean by that? That there are some trends that you have not shown or that there are no trends in the particular areas you are referring to? Not clear.

Thank you for this comment. We refer to the use of the detrended dataset, which is free of long term trends. The specific areas we mention here are those exhibiting positive EMS anomalies for all three examined MHW metrics (see draft figure above). This suggests an enhanced role of MHWs during EMSs in these areas, regardless of long term trends.

**C113.Lines 444 – 445:** “Among these regions, the Aegean Sea stands out as the one presenting a pronounced MHW contribution to EMSs both in the original and the detrended data...”. Again where am I supposed to look for these results? Is it figure 6 or not? Figure 6 does not include comparison between the detrended and the original dataset, no? These statements here look like they come from nowhere since there is no reference to any figure inside the paper or any other result.

Thank you for this comment. Please, see our previous answer in C111.

**C114.Lines 446-447:** “...Given that, the pronounced role of MHWs in EMSs in the eastern basin can be only partly attributed to the sea surface warming trend in the MS during the past few decades...”. How do the writers know that the pronounced role of MHWs in the MES in the eastern basin is only “partly” attributed to SST warming? Where do they show that it is “only partly” attributed? Have they compared any other variable such as trends of the MLD, winds?(e.g. trends of lower winds in the area or trends of shallower than normal MLD). I find these arguments a bit unfounded since there are no results to look at and compare at this point.

Thank you for this comment. Please, see our previous answer in C111.

To clarify our initial intent: By comparing MHW anomalies for EMSs between the original and the detrended dataset (Fig. 6 vs figure provided above), we see that the Aegean Sea presents positive EMS anomalies for all examined MHW properties in both cases. In other words, the Aegean Sea appears to present enhanced MHW conditions during extreme summers (compared to climatological summers) independently of long term trends. However, the positive EMS anomalies in this area are slightly larger in the case of the original data. This potentially suggests that the long term trends, including the warming trend in the area during the past few decades, may be to a certain extent responsible for this finding.

However, as noted in C11, we have removed such discussion, as it is not properly supported without providing additional figures.

### **C115.Section 3.3**

The entire section here describes results on air-sea heat fluxes without giving any indicative numbers on the increased or decreased contributions presented in Fig.7. The

description here is something between a Results section and a Discussion. The entire section should be re-written where some indicative numbers of the spatial distribution of the air-sea heat fluxes should be given, separately as Results and then in the Discussion section there should be a comparison with current knowledge and literature.

Please, see our previous answers in C10 and C14.

**C116.Lines 449-458:** Is this analysis only for the original dataset and the detrended one is only shortly discussed in Section 3.3.5? Clarify in this paragraph.

Yes, this analysis is only for the original dataset. This will be clarified.

**C117.Lines 465 – 467:”** *Moreover, positive Qnet anomalies appear mainly in areas where enhanced MHW conditions in EMSs were detected (northern Mediterranean regions and particularly the Aegean and the Adriatic Seas; Fig. 7A vs Figs 4d-f)*”. I am not sure what is the point behind the connection between Fig.7a maps with the results from Fig.4d-f that refer to points. After all, the points that were (randomly?) selected from 3 regions (Fig.4) cannot represent the EMS profile of the entire area (from where they came from). In addition, we do not know if the EMSs of other points, e.g in the south-central Med. Sea exhibit the same behaviour as those in Fig.4, but are in areas characterised by negative Qnet. So I am not sure what is the argument behind this sentence. Is a cause-effect result implied here?

Thank you very much for noting this, it is a typo in the reference. Instead of “Fig. 7a vs Figs 4d-f” we should have written Fig. 7a vs Figs 6d-f. Our apologies as this obviously made you struggle to make sense. The similarity in spatial distribution of positive anomalies in the fields of the correct figures is noticeable.

**C118.Lines 468-469:** “This similarity is at least partly attributable to the widely explored driving role of air-sea heat fluxes in the formation of MHWs”. How can a similarity between a map and 4 points (?) be attributed to “a widely explored role of air-sea heat fluxes”? What exactly is the similarity here and how is it related to the fact that we know a lot about air-sea heat fluxes? I do not understand the argument here. Clarify. Also, the studies cited here are global studies examining drivers of MHWs at a local scale. Better to cite studies that refer to the role of air-sea heat fluxes in Mediterranean MHWs and not on global events.

Please, see our previous answer in C118.

**C119.Line 475:** Either ‘above-mentioned’ or ‘aforementioned’. Replace.

**C120.Lines 485 – 487:** This is a far-fetched claim to be made. Although there seems, indeed, to be a slight reduction of MLD across the Turkish coasts, I am not convinced that the reduced upwelling can be inferred solely from an MLD indicator. Especially because the MLD refers to extreme EMS summer which, at the moment, I am not quite sure which period exactly they refer to and if this period coincides with the exact period of the upwelling in the area. Also, the anomalies of the MLD apparently are computed with respect to a different baseline period, which cannot perhaps be directly compared with

the anomalies of the rest of the variables of Fig.7, let alone to be linked with the impacts of EMS. In addition, is this reduction of MLD significant enough to suggest there is going to be reduced upwelling? Either compute trends of the upwelling index in the area or the authors should entirely remove this claim from the paper as it is not substantiated.

Thank you for this comment. MLD anomalies are computed for EMSs as for all variables (mean-EMS value minus mean summer value). For information on the period that EMSs refer to and how they are defined, please refer to C3. As regards the reference period for the computation of MLD anomalies, please refer to C17 where we justify our choice. We agree that the reduced MLD in the discussed area is insufficient evidence for reduced upwelling. Even if these lines express a hypothesis, they do not offer substantial information and we have entirely remove them from the manuscript.

**C121.Lines 487 – 488;** “SH flux (Fig. 7d) and net SWR anomalies (Fig. 7c) in the eastern Aegean and the central Levantine Seas are negative but of a much smaller magnitude.”. How much is the magnitude here? Quantify this information wherever possible.

We have revised this section accordingly. Please, see our answer in C16.

**C122.Figure 7.** In the text shortwave radiation is referred to as SWR, whereas in Figure.7 as SW. Be consistent on the naming of variables everywhere.

**C123.Lines 502 – 506:** How can the Qnet anomalies in the Adriatic Sea be “*almost fully determined*” by shortwave radiation (line 503) when there is also a reduction of LH losses according to Fig.7b? I think the LH also plays a significant role here and it is not just the SWR.

Thank you for your comment. Negative LH flux anomalies indeed indicate a reduction of the LH flux in EMSs. Given however that we do not use absolute numerical values for fluxes, the negative LH anomalies suggest smaller negative real values of LH flux, i.e., greater heat loss. A relevant note exists in the legend of Fig. 7 to avoid confusions. In general, negative heat flux anomalies correspond to either a reduced heat gain or increased heat loss from the sea surface (always relative to normal heat exchange).

Please, see also our previous answer in C16. We show therein why the additional heat gain (in EMSs compared to normal conditions) that we see in most of the Adriatic is attributed to SWR anomalies. We also explain this in the following comment.

**C124.Line 504-505:** “*The increased LH loss in EMSs here is exceeded by the gain in net SWR, leading to the observed net heat gain*”. This sentence does not make sense at all. I do not understand what the writers want to say here. Also, I do not see anywhere an increase or LH losses. I rather observe a reduction of LH losses.

Please, see our previous answer and the answer in C16.

This sentence refers to the Adriatic Sea where we generally observe: positive SWR anomalies, negative LH anomalies and positive Qnet anomalies in EMSs, relative to their mean climatological

values. Please note that downwards fluxes have been considered as positive. Positive anomalies (red color) therefore indicate either a greater heat gain than normal or smaller heat losses than normal. The negative LH flux anomalies here indicate greater LH losses than usual.

**C125.Lines 514 – 515:** “*MLD and wind speed anomalies tend to present the same sign, especially where large anomalies appear.*”. Although this is true for some regions of the basin, I can see also other areas (e.g. southeast Levantine) where the windspeed is lower than normal and MLD is higher than normal. Again, at the moment there cannot be a direct comparison between MLD and any other variable of Fig.7 given the fact that the anomalous fields are computed based on different reference periods.

Please, see our relevant answer in C17.

**C126.Lines 509 – 520.** This paragraph again is a mix between Results (without any indicative numbers) and a Discussion which does not reveal anything novel. The writers try to claim a relationship between wind and MLD (which is already well-known), albeit on anomalous fields that are computed based on different periods. Again, this paragraph should be rewritten separately for the Results section, where indicative numbers are given and the comments should be addressed in the Discussion section.

Thank you for this comment. It is important to clarify that we present and discuss findings for extreme summers in relation to climatology, we do not relate wind and MLD in general. Despite the existing literature on this relationship, we considered adequate to examine the seasonal anomalies of MLD and wind speed during the studied EMSs, and shortly discuss them in relation to other variables. As regards the different reference periods, please see our justification in C17.

**C127.Lines 531-532:** “*These fields suggest that LWR and SWR (standing for net values from now on) in EMSs work complementarily in the basin.*” What do you mean by complementarily? I do not understand.

Thank you for noting this. SWR and LWR anomalies work inversely in many areas presenting opposite signs and this is described in the following paragraph in the manuscript. Therefore “complementarily” may be confusing, potentially suggesting the opposite meaning. This part has been revised accordingly.

**C128.Lines 536:** The Figures of the supplementary material better be named as e.g. Fig.S3a instead of Fig.B3a. What does “**B**” stand for? I have never seen this in the literature so far. Also from Fig.B3a, I can see positive anomalies of cloud coverage in the central Aegean but also negative cloud coverage to the southern-southeast Levantine, where the LWR anomalies are close to zero. So the statement “Indeed, positive EMS anomalies of total cloud cover derived from ERA5 are found in this area (Fig. B3a) leading to increased downwards LWR and the observed reduced net LWR loss from the sea surface (Fig.7e)”. Is not entirely true for the Levantine basin.



According to the manuscript composition guidelines “Appendices should be labelled with capital letters: Appendix A, Appendix B etc. Equations, figures and tables should be numbered as (A1), Fig. B5 or Table C6, respectively.”

On your comment on Fig. B3a: We agree this is true for a large portion of the Aegean and Levantine Seas but not entirely true for the Levantine basin. We see that moving towards the southern-southeast Levantine the cloud coverage anomalies become negative, SWR anomalies become positive and LWR anomalies approach zero values, suggesting clear sky conditions during EMSs in these areas (from top to bottom, you can see gathered below Fig. B3a, Fig. 7c and Fig. 7e). This has been specified in the revised manuscript.

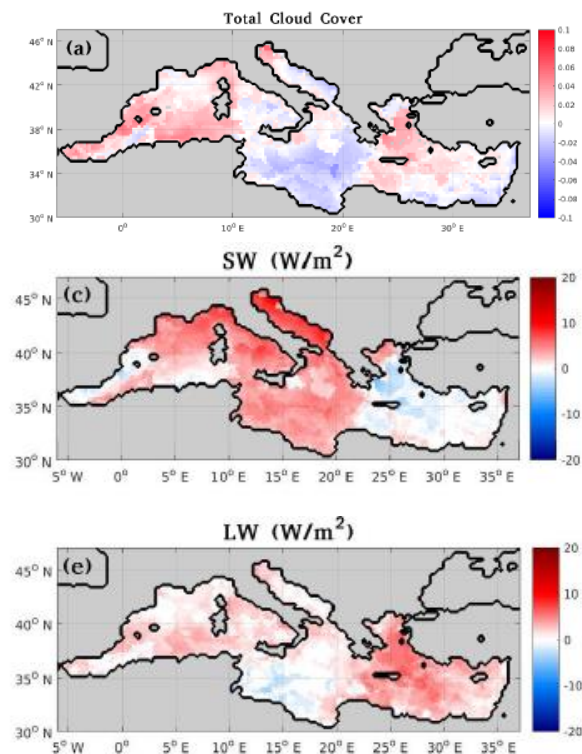

**C129.Line 538-539:** “Particularly in parts of the Adriatic and the northern Ionian Seas, the SWR surplus is responsible for the net heat gain observed in EMSs (Fig. 7a vs Figs 7b-e)”. Since there is Section 3.3.3, where the contribution of each air-sea heat flux is quantified, better to combine these two section together. There is no point in describing qualitatively the air-sea heat contributions here, without giving any quantifiable information and then create a new section later (3.3.3) where the contributions are actually computed. Also, by looking the maps of Fig.7 I cannot deduce that it is only SWR surplus that is responsible for the net heat gain of the EMSs in the Adriatic and the Ionian Sea. I would argue that reduced LH losses contribute as well.

Please, see also our previous answer in C16. We show therein why the additional heat gain (in EMSs compared to normal conditions) that we see in most of the Adriatic is attributed to SWR anomalies.

**C130.Line 541:** “Results suggest that *Q*net anomalies (either positive or negative) in EMSs are primarily formed by LH fluxes in most areas, followed by SWR in the western and central basin and particularly in the Adriatic Sea.” This contradicts the sentence just above, where SWR is responsible for the net heat gain!

Thank you for noting this. We agree that the word “followed” here may be misleading. Our intention was to report that SWR is the second most important component in forming *Q*net basinwide (in terms of spatial extent), not the second most important in the Adriatic Sea (where it is the most important). This has been corrected in the revised text.

### **Section 3.3.2:**

As before, this section appears more as a Discussion section rather than a results section as no quantification is provided. This description (if needed) needs to be transferred to a discussion section.

**C131.Line 550-552:** “Differences in the behavior of surface heat fluxes are expected to exist among the locally detected EMSs and the mean EMS state presented in the previous Section. To shed light on this, Fig. 8 illustrates how common is a positive anomaly for each of the examined heat flux components during EMSs”. I do not see how the frequency of positive anomalies occurrence at each grid point, constitutes “a mean EMS state” while the analysis performed in the previous sections is on “locally detected EMSs”. Since both analysis yield maps that means that both fields refer to locally detected properties. I suggest to change the title of the entire section here.

Thank you for this comment. We do not claim that the occurrence frequency of positive anomalies at a particular location constitutes a mean EMS state. The provided frequency number, ranging from 0/4 up to 4/4, serves to inform on how the mean EMS values (i.e., values averaged over the 4 EMSs) are formed. For example, if SWR anomalies in the Adriatic would present positive values in only one EMS, being however high enough to lead to a positive SWR anomaly averaged over the 4 EMSs, such a mean EMS SWR anomaly would be misleading.

The section is entitled “Differences among local extreme marine summers” as it actually shows differences between the 4 extreme summers of each location. The expression “locally detected EMSs” wherever used in the manuscript only aims to remind that EMSs are detected independently at each location (which is not a given). To avoid any confusion related to spatial differences, we have slightly renamed the section “Differences among extreme marine summers”.

**C132.Figure 8.** I suggest changing the color palette in this figure since red usually means higher and purple/blues lower. The red colour draws the attention a lot to the lower values of the frequency of occurrence.

**C133.Lines 556-557:** “The areas where positive *Q* net anomalies in EMSs are more frequently met are the same as where the largest positive mean EMS *Q* net anomalies were found (Fig. 7a vs Fig. 8a)”. I am not sure this is true. For example in Fig.7a, I can see higher *Q*net anomalies in the Adriatic and the northeast Aegean, which do not exactly coincide with the highest frequency of *Q*net anomalies of Fig.8a. For a better comparison between these two maps, it is better to use a pattern correlation coefficient instead of just a visual

comparison. What is the point of showing both figures 7 & 8? I do not see any differences in the main message behind these two sections and the one coming after that (Section 3.3.3).

Thank you for this comment. On the point to show this analysis, please see our previous answer in C131. On the example you mention, we totally agree on what you observe, but we wouldn't really expect to see an identical behavior of a variable in every single EMS at a particular location. We considered however important to examine how the mean-EMS values are formed, and provide this information to the reader in a short sub-section. The idea of using these maps was considered a concise means for providing this information.

**C134.Lines 566-567:** *“In the same locations, SWR radiation appears increased in most EMSs, reinforcing the mean EMS findings.”*. What kind of EMS findings are reinforced here exactly?

The mean-EMS findings are presented in Fig. 7. As regards SWR, we see in the discussed locations that there are positive SWR anomalies (Fig. 7c). In these lines we report that SWR is greater than usual in most EMSs (3/4 or 4/4) at these locations. If this was not the case, the mean EMS findings would not be supported in the sense that the use of a mean EMS value would be less meaningful.

**C135.Lines 569 – 571:** *“Negative Qnet anomalies appear in every EMS in the Ligurian, the south-central as well as in a few specific spots in the WMED Sea, despite the systematically increased SWR. In these areas wind appears always reduced in EMSs (although not followed by decreased LH loss), while suppression of vertical mixing is observed only in half (or less) of the EMSs (Fig. 8c)”*. I am not sure where is the figure that shows negative Qnet anomalies as Fig.8 demonstrates maps on positive Qnet anomalies only. So I am not sure why Fig.8c is cited here. Confusing, Clarify.

Thank you for your comment. Figure 8 does not show only positive anomalies. Fig. 8a shows how many EMSs present positive Qnet anomalies. The discussed areas are colored in red color which stands for 0. Therefore, in these areas the anomaly of Qnet relative to climatology (i.e., relative to the mean value of Qnet over all summers in 1950-2020) is negative in every EMS. As regards Fig. 8c, it is cited because it shows how many EMSs present negative MLD anomalies. For the discussed areas, although there are weakened winds in every local EMS (Fig. 8b), MLD anomalies are negative in half (or less) of the EMSs (Fig. 8b), suggesting that the weakened winds in EMSs are not necessarily accompanied by reduced MLD in these areas.

**C136.Lines 578 – 580:** *“...we expect that the responsible cool summer days (being warmer than usual) are mostly the early summer ones.”*. The fact that the early summer days are...the cooler summer days with respect to the days during the heart of the summer .. is obvious. I do not understand the point behind this sentence.

Thank you for your comment. The cooler summer days are not necessarily the early summer ones, considering the JAS marine season. In the discussed area (in the south-central basin off the African coasts), the coldest half of the SST distribution is found to contribute the most to the seasonal SST anomalies in EMSs. But this finding alone does not inform on whether this part is formed by the

early or the late summer days. The increased mixed layer heat content before the beginning of almost every EMS in this area motivated us to further investigate the SST distribution during EMSs in the area, which confirmed that SST in July of these EMSs present greater anomalies than September. Please, see also our answers in C137 and C140.

**C137.Lines 580 – 583:** *“In all EMSs in this area, the early summer (July) SST anomalies are the largest within the season. The increased mixed layer heat content in June is reflected in the positive SST anomalies of June while, also in May, SST in this area was found marginally larger than climatologically.”* Which figures shows all this? Confusing.

Thank you for this comment. In Line 580 we note that results from this test are not included in the manuscript. We show these results below. For the colored area in the map, we may see the area-averaged seasonal cycle of SST with colored lines for the EMS-years, and gray lines for the rest of the years. The dashed line shows the mean monthly climatological SST for the reference period 1950-2020. We examined the seasonal cycle using both the original and the detrended dataset (top and bottom figure, respectively). This was done to check if the SST anomalies in June (relative to climatological values for June) before the beginning of an EMS in this area are positive also when the surface warming signal is removed. Indeed, late spring (June) SST values before EMSs are warmer than usual in this area also in the detrended dataset, i.e., independently of the warming trend, as noted in lines 589-90. Please, see also our answer in C140 below.

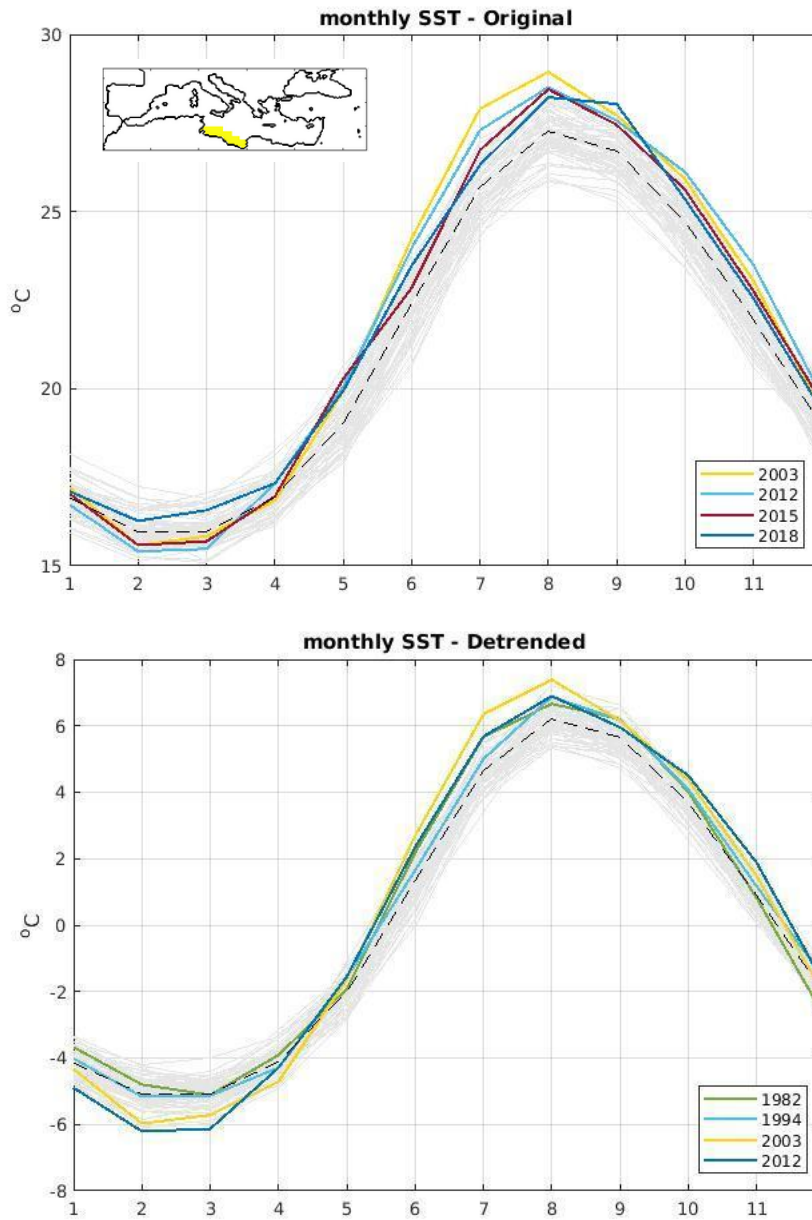

**C138.Lines 584:** “The temporal coverage of the modelled temperature and MLD used in the OHC calculation inevitably limits this task in using...”. Which task do you refer to? Not Clear.

Thank you for noting this. We refer to the OHC calculation. The computation of the anomaly of any variable in EMSs requires that the EMS-years fall within the available period for that variable. EMS anomalies for MLD and OHC are presented only using the original dataset, as in the detrended dataset EMSs may fall out of the available period (1987-2019).

**C139.Lines 586 – 587:** “*For this reason, a complementary task included the use of the detrended dataset only for locations that experience EMSs within the available period..*”? Which one exactly is the available period, not clear.

The period 1987-2019, this has been specified in the revised manuscript.

**C140.Lines 589 – 590:**” *In the region discussed above (south-central basin), increased upper ocean heat content and spring SST values are observed before each EMS also in the detrended dataset, i.e., independently of the warming trend*”. Isn’t this something that one should expect given that as the summer approaches, the heat content of the ocean is ..bound to increase more and more? I am not sure why the writers expected that the detrended dataset should show “no preconditioning” or no increase of the heat content of the ocean as we move to the summer. Also how much warming above average is the preconditioning considered as “preconditioning” and not just the normal increase of the period before the EMS? Not clear this.

Thank you for this comment. The mixed layer heat content anomaly (i.e., the pre-conditioning index in this work) is computed relative to its mean climatological value (June-before-EMS – mean-June). Therefore, a positive value of this anomaly indicates a greater heat content than usual, not the normal increase of heat content as the summer approaches.

As regards the original vs the detrended dataset: In the original dataset EMSs fall within more recent years. This means that the ocean heat content anomalies before the beginning of these summers are expected to be affected by the upper ocean warming signal, which is not the case in the detrended dataset. Using either of the datasets, the proposed pre-conditioning index does not capture, by construction, the normal heating as the summer approaches, but deviations from climatology.

**C141.Lines 594 – 596.** “*Usefulness of this index is highlighted when examining single summers (e.g., the exemplary case of EMS 2015 in Sect. 3.3.4). Even if it is positive in most cases, its contribution is often enhanced when and where there is no causal link between the surface net heat balance and the observed surface warming thus revealing it constitutes an actually contributing EMS formation factor*”. Does the “surface net heat balance” refer to Qnet? Keep consistent names throughout the paper. Generally it is not a very good practice to refer to a section and describe its results before the section itself is presented in the paper. It is disrupting for the reader. In addition, I have not seen anywhere so far in the paper **any causal link** between the surface Qnet (surface net heat balance?) and the SST warming. The only thing the authors have presented are visual comparisons between maps of physical variables, which are not supported by any good “statistical index” denoting the degree of similarity in their spatial distribution. So I would be careful not to use the words “causal” link, unless specific analysis has been done for specific events that prove the causal link.

Thank you for these comments. We will remove the reference to the section not yet presented to avoid disrupting the reader.

As regards Qnet: Yes, it is the surface net heat balance. We agree on the use of a single term, this has been corrected in the revised paper. The areas with positive Qnet anomalies during EMSs

experience greater heat gain during these summers than climatologically. This finding potentially suggests a causal link between the extra heat uptake and the anomalously warm sea surface but it is indeed not further supported in this section where we only present and discuss seasonal anomalies. We have revised such wording in this section, as the degree to which Qnet drives EMSs is quantified later on, using the proposed metric.

**C142.Line 597:** Apart from the fact that the entire paragraph does not belong to the Results section, as it mostly comments on the results, the writers suddenly go from Fig. 8d at the start of the paragraph, to referring Section 3.3.4 (that has not yet been presented) and then suddenly mention Fig.9d (also not presented yet) without having present figures Fig.9.a-c before that. In general the Figure references should be more structured in the text and should come with an order.

**C143.Lines 598-599:** *“Although horizontal advection is not investigated in this study, this finding potentially suggests that EMS preconditioning hardly takes place in areas of intensified circulation.”*. Which areas do you refer to exactly? Clarify.

These lines consider the results presented in the previous sentence for the Alboran Sea and the area surrounding the Strait of Sicily.

### **C144.Section 3.3.3**

I am not sure how the results from this section differ from those in Sections 3.3.1 – 3.3.2. I understand the writers used an extra way to quantify this time the contributions from the different air-sea heat fluxes (apart from the quantification of the contribution that was necessary to begin with). But what is the added value of another yet way to see the contributions of the different air-sea heat fluxes to the EMS? I do not understand, qualitatively, what is the new knowledge we gained in Section 3.3.3 compared to Section 3.3.2. and 3.3.1. For example, in line 608, where the contributions are discussed, the Fig.7g is also cited to support the hypothesis that was also evident from the quantified contributions themselves. Probably this quantification metric is more meaningful than the descriptions from Section 3.3.1 and 3.3.2. However, at the moment the metric is not very clear in its explanation in the Appendix. It is quite difficult to understand how the writers constructed it, e.g. what is the difference between SSTA cum >0 (which is stated as SST anomaly in the Appendix), with the  $\Delta$ SST'obs? Is the second data anomalies from SST'obs? Is the second data anomalies from observations only? It is very confusing.

In addition, before the writers start describing the PEMS of Fig.9, they should give a qualitative definition at the start of the section to the readers as to what each positive or negative PEMS means and then continue with the description of their spatial distribution. At the moment the PEMS meaning is scattered here and there when the spatial distributions are analysed.

Thank you for your comment.

On the distinct content of 3.3.1, 3.3.2 and 3.3.3:

Section 3.3.1 presents seasonal anomalies of the examined variables (Qnet, its components, MLD and OHC for pre-conditioning) for EMSs relative to climatology. Section 3.3.2 informs on

differences in the behavior of the examined variables between the 4 EMSs at each location. Section 3.3.3 quantifies the role of air-sea heat fluxes in the formation of EMSs (It does not inform on the different air-sea heat fluxes). The seasonal anomalies for the examined variables in 3.3.1 are important findings as we aim to investigate potential drivers and concurrent conditions, but they do not answer the question: "what drives the formation of EMSs". The added value of 3.3.3 is that it actually quantifies the driving role of air-sea heat fluxes in forming EMSs.

In Line 606-608 we refer to areas where MLD and WSPD seasonal anomalies are negative, which suggests wind-driven shoaling of the mixed layer. In these areas,  $0 < P_{EMS} < 100$ , which suggests that air-sea heat fluxes are not the only EMS driver. Therefore, we considered adequate citing such information on the sub-surface during the same EMSs in these areas.

On the metric construction:

$SSTA_{cum}$  during a summer sub-period (from day  $t_0$  to day  $t_1$ ) is the cumulative SST anomaly used to separate sub-periods according to their contribution to the mean seasonal SST. We only work with sub-periods of positive  $SSTA_{cum}$ .  $SSTA_{cum}$  values are also used later on to weight the contribution of each sub-period when producing a single metric value for the season.

As presented in Appendix, it is computed as follows:

$$SSTA_{cum} = \sum_{t_0}^{t_1} (SST_t - SST_{t_{clim}})$$

where  $SST_t$  and  $SST_{t_{clim}}$  the daily SST of day  $t$  and the corresponding climatological day  $t_{clim}$ , respectively. Indices  $t_0$  and  $t_1$  stand for the start and end day of each phase, respectively.

$\Delta SST'_{obs}$  during a summer sub-period is the change in daily SST anomaly:

$$\Delta SST'_{obs} = SST'_{t_1} - SST'_{t_0} = (SST_{t_1} - SST_{t_1_{clim}}) - (SST_{t_0} - SST_{t_0_{clim}})$$

where  $SST'_{t_0}$  and  $SST'_{t_1}$  are the daily SST anomalies at the start and the end day, respectively.

The subscript *obs* stands for observed (based on the reanalysis SST).

We have added the word cumulative when referring to  $SSTA_{cum}$ , as calling it SST anomaly is indeed confusing. We also agree on your suggestion to include at the start of Sect. 3.3 a qualitative definition on what positive or negative PEMS means. This has been included in the revised manuscript.

**C145.Line 606:** *“In positive P EMS areas with  $0 < P_{EMS} < 100\%$ , other mechanisms are expected to work complementarily (i.e., towards greater SST anomalies)”*. What does complementarily mean? What does it mean towards greater SST anomalies?

Thank you for this comment. Please, see our answer in C144 for Line 606.

In areas where  $0 < P_{EMS} < 100$  we expect additional mechanisms to contribute to the observed SST anomalies in EMSs. The metric focuses on summer sub-periods where SST changes towards greater anomalies. This means that during these sub-periods the SST either increases at a greater



rate than usual or decreases at a slower rate than usual. In other words, when this criterion is satisfied (mathematically summarized in  $\Delta SST'_{obs} > 0$ ) the SST anomaly of the last day of the examined period is always higher than the SST anomaly of the first day of that period. Therefore, during the selected sub-periods SST changes towards greater anomalies. In areas where  $0 < P_{EMS} < 100$  we expect additional mechanisms (on top of the air-sea heat fluxes) to contribute to these SST changes, i.e., to drive these SST changes together (complementarily).

**C146.Line 612:** “..hence oceanic processes definitely drive EMSs in these areas”. I would avoid statements with “definitely” since the contributions from oceanic processes have not been actually proven here. They have just been inferred.

**C147.Figure 9:** I am not sure what panels b), c) e) f) are showing exactly. What is the “warming phase” and “cooling phase” that are being subtracted here? How are they represented mathematically? Also I do not understand what is the use of an index where the warming and cooling phase are being subtracted. Clarify. In addition, in the citation of the figure, the writers should clarify the qualitative meaning of the PEMS metric and not just refer to it like : “ PEMS metric values (%) for the contribution....”. The citation is supposed to make the reader understand what are they looking at. At the moment I only understand that I am seeing some percentages of contribution.

Thank you for this comment. The process to isolate warming/cooling phases and compute the metric is presented step-by-step in the Appendix A. The mathematical explanation of the metric’s computation separately for the warming and cooling phases is provided in Lines 865-872. There is not any “subtraction” of warming or cooling phases.

As explained in the manuscript, the selected warming (cooling) phases are the summer sub-periods where SST increases (decreases) at a greater (lower) rate than usual. The purpose of this additional task was to examine the role of heat flux in EMSs, separately during the selected warming and the selected cooling phases. We totally agree that info on the qualitative meaning of the metric should be included in the Figure’s caption. The caption has been updated accordingly.

**C148.Lines 627, 639:** 1) “These values indicate that oceanic processes are primarily responsible for the observed EMS SSTs in these areas”, “Hence high SST anomalies leading to EMSs in these areas are formed despite the thermal energy deficit at the sea surface during the same periods.” These sentences are confusing. You are saying that there are EMSs happening but..there is thermal energy deficit. How is this possible? Clarify.

Thank you for this comment. Negative  $P_{EMS}$  indicates that the surface heat fluxes do not work in favor of the formation of EMSs. In such cases, the air-sea heat exchange corresponds to a thermal energy deficit (always relative to climatological values for the examined period of the year). We should have specified in the quoted sentence that we refer to the energy deficit at the sea surface due to non-favoring (for the formation of EMSs) heat exchange with the atmosphere, not an energy deficit in general. This has been corrected in the revised manuscript.

**C149.Lines 631 – 633:** “The present section complements this finding by revealing that a thermal energy deficit at the sea surface is consistently observed in these areas even

*when focusing solely on highly effective (for the EMS formation) warming phases”.*

Rephrase.

**C150.Line 650:** *“Results also reveal a strong link between MHW properties and surface heat fluxes (Fig. 9a vs Fig. 6d)”.* I think this is a proven statement, multiple times already??  
Why do you need to prove it again?

Thank you for this question. Results from the proposed metric that we discuss here are based on the summer sub-periods that are the most responsible for the EMS SST anomalies. The link we report in this sentence is indeed not revealed here for the first time, it is however further supported in relation to the formation of EMSs.

**C151.Lines 654- 655:** *“The spatial similarity of MHW intensity and PEMS over the basin suggests that the crucial role of surface heat fluxes found for the northern MS is associated with their ability to drive high SST anomalies (thus intense MHWs)”.* I still cannot understand the difference between EMS and MHWs in terms of high SST anomalies. They are both referring to high SST anomalies in general.

Thank you for this comment. Please, see our answers in C8.

#### **C152.Section 3.3.4**

The example of the Marine summer 2015 kind of suggests that there is not much of a difference between EMSs and MHWs. More specifically, Lines 569 – 661, are justifying the exploration of the EMS 2015, based on a citation about a MHW in the summer of 2015!. The writers need to either clarify what is the difference of EMS from the MHWs and thus, their usefulness compared to the MHWs or re-think the idea of EMS in total. In principle, these two definitions demonstrate two different ways to capture extreme warm temperatures in the ocean. Either, use one of them without comparison with the other or re-think the idea of the EMS.

Please, see our answers in C8.

**C153.Lines 679-681:** *“On the other hand, the preconditioning index is clearly more pronounced here than in the positive part (Fig. 10d). Indeed, early summer days (July 2015) present...”.* I thought the early summer days of the preconditioning phase was the month of June according to Section 2.2.5

Thank you for this comment. The months Jul-Aug-Sep have been considered as marine summer period, so early summer days fall within July. The considered preconditioning phase is the month June as explained in Methods.

**C154.Lines 685-686:** *“Following 2015, other widely experienced EMSs such as 2003, 2012, 2018 (in descending order by means of spatial extent) are examined (not shown)”.* These years also constitute MHW years in the Med. Sea. So I cannot see the usefulness/added value of the EMS definition in identifying extreme ocean periods when compared with the MHW definition.

Thank you for this comment. Please, see our answers in C8.

### **C155.Section 3.3.5**

If the writers re-think the idea of the EMS and justify its usefulness as an index then the analysis of the contribution of air-sea heat fluxes in the detrended datasets deserves to be shown as a comparison to the equivalent results with the original dataset and its figures should be juxtaposed and commented in the main text.

Thank you for this suggestion. As noted in C13, we have moved the analysis of heat fluxes based on the detrended dataset right after the equivalent analysis of the actual data (3.3.1). We have kept the corresponding figure in the Appendix, to avoid interrupting the manuscript flow as well as because this figure in the form that is currently presented in the Appendix already juxtaposes results from the 2 datasets.

### **Conclusions and Summary:**

**C156.Lines 794- 796:** *“Nevertheless, the multi-decadal signal contributes to the observed surface warming through more intense and slightly longer lasting MHWs, without affecting the MHW intensity spatial distribution, thus most probably also the event driving mechanisms”*. I do not understand how the multi-decadal signal contributes to more intense events without affecting the intensity spatial distribution and the event driving mechanisms. How do you infer that the event-driving mechanism is not affected? Clarify.

Thank you for this comment. Please, see our relevant answer in C106. This sentence has been removed as it is not sufficiently supported.
